# Supplementary material for: Variation of connectivity across exemplar sensory and associative thalamocortical loops in the mouse
Source: eLife. 2020 Oct 26;9:e62554. doi: 10.7554/eLife.62554 (PMC7644223; doi:10.7554/eLife.62554)
Supplement: Figure 1—figure supplement 2—source data 1. [file elife-62554-fig1-figsupp2-data1.xlsx]

## Sheet: Sheet1
	Delta Change in Firing Rates Normalised to Baseline (%) - Individual Animals
		MD-->PL (RS)					MD-->PL (FS)								MGB-->A1 (RS)					MGB-->A1 (FS)
M1	M2	M3	M4	M5		M1	M2	M3	M4	M5			M1	M2	M3	M4	M5		M1	M2	M3	M4	M5
0.051374	0.316915	-0.118213	0.0914454	-0.292237		2.11594	0.141302	0.153837	0.820331	0.621622			0.142857	0.0913908	0.0432316	-0.0486674	1.3		-0.391026	-0.026593	0.230374	NA	0.0693069
0.269608	-0.0109701	-0.137236	0.212963	-0.033189		0.910569	-0.230953	0.15889	2.06202	0.296296			0.454545	-0.109023	0.299076	-0.0175953	0.677019		0.15873	-0.132625	0.191508	NA	0.885714
-0.077381	-0.0895509	-0.31899	0.0622711	-0.0934066		0.666667	0.130832	0.0232958	0.786571	0.156821			0.2	-0.0947841	0.132499	0.505089	0.676471		-0.386243	0.138844	0.319821	NA	-0.326923
-0.0540541	0.0855835	0.0760298	-0.0933333	-0.0849673		0.973684	0.0103047	0.239731	2.08824	0.0986733			-0.157895	-0.214863	0.171733	0.354974	0.212544		-0.209524	-0.0228885	0.107885	NA	-0.0958904
-0.03125	0.0359814	-0.274994	0.355759	-0.181287		1.07483	0.104877	0.057223	1.20513	0.202381			1.66667	0.186958	0.0920707	0.0839092	0.582418		-0.533333	-0.0716466	-0.150705	NA	-0.0808081
0.286353	0.27739	-0.371739	0.17284	-0.153005		0.585366	-0.126933	0.0912373	0.37037	0.21118			0.0204082	0.153551	0.118691	0.236882	0.477477		0.5	0.422734	0.0942492	NA	1.36364
-0.0804598	-0.0236511	-0.0307665	-0.152381	-0.0842491		0.688034	0.150397	-0.042072	1.84314	0.483051			0.333333	0.0549649	0.223525	0.17931	0.68254		-0.531915	-0.154111	-0.124033	NA	0.0697674
-0.0522876	-0.215463	-0.431095	-0.00337838	-0.138486		0.666667	0.0559333	-0.0645043	0.480815	0.320346			1	0.108176	-0.042761	-0.148653	1.64		-0.68254	-0.0919326	0.0406392	NA	0.28125
-0.127838	-0.168107	-0.316772	-0.240991	0.124031		0.203704	0.0313249	0.0555811	1.87037	0.578947			-0.938144	0.205825	1.32221	0.686054	1.51282		-0.647059	0.185996	-0.0655716	NA	0.652174
0.361257	0.0597955	-0.158382	-0.772727	0.0249042		0.818182	0.0499179	0.120671	2.01075	0.225854			-0.974026	0.118188	0.0699725	0.365047	0.863014		-0.255172	-0.115826	-0.207296	NA	1.04444
-0.00990099	0.0816959	-0.696712	-0.269663	0.0815603		0.434109	0.0513453	0.165141	1.19298	0.178571			-0.932432	0.15765	-0.0398584	0.19802	0.0153846		-0.383333	-0.0273351	-0.0964398	NA	-0.296
0.111111	-0.0334766	-0.477999	-0.266667	-0.444444		0.666667	-0.178066	-0.0203634	0.487179	0.0350448			-1	0.0221622	0.138901	0.169118	0.647059		0.0285714	0.139781	-0.136578	NA	1.72727
-0.304734	-0.300733	-0.140496	-0.6875	0.152778		0.141304	0.0619041	0.0261646	1.09877	0.239496			-0.956522	-0.160733	0.18294	0.136065	1.85714		-0.661017	-0.106897	-0.0951832	NA	0.284404
-0.439153	-0.0227635	0.0317364	0.857143	-0.0238095		0.0977564	0.0471418	0.42072	0.294326	0.30137			0.557522	0.104643	0.214677	0.112344	0.0538642		-0.402597	0.0812445	-0.319407	NA	0.176471
-0.0740741	0.159227	-0.418224	0.164384	0.0329861		0.0925926	0.0848946	0.474366	2.84615	0.261905			0.165312	-0.283469	0.0299847	0.158195	2.42857		-0.444444	0.225574	0.051201	NA	-0.234043
0.015625	0.0222093	0.0731181	-0.380952	0.124031		0.0174029	-0.0209462	0.186262	0.488095	0.141176			0.704918	0.0749736	0.205927	0.191631	2.26316		-0.145729	-0.00449616	-0.0231083	NA	-0.408219
-0.150066	-0.15139	0.201206	-0.917695	-0.017341		0.108247	0.116978	0.0819289	1.08333	-0.102564			0.69697	-0.0798898	-0.00407042	0.0848929	-0.149606		0.5	0.0886576	0.388975	NA	-0.427083
-0.00442478	-0.167614	0.264081	0.846847	-0.39528		0.15942	0.052861	-0.0449527	0.282407	0.254682			0.142857	0.0813792	0.258978	0.116022	2.3913		-0.0495868	0.0414782	-0.0644792	NA	2.09091
-0.172772	-0.0995454	0.00272249	-0.348659	-0.197422		0.126126	-0.116447	0.0888865	-0.245495	0.327434			1.66667	-0.248848	0.163707	0.147838	-0.271028		-0.333333	0.171337	-0.10219	NA	0.466667
-0.102564	0.0934317	-0.245075	0.0714286	0.0351377		0.0873694	0.216908	-0.00798378	0.0458839	0.230907			1.4	0.121335	0.155634	0.119298	1.81818		-0.0704846	0.128967	-0.134475	NA	-0.246154
-0.163373	-0.0551418	-0.377218	-0.491525	0.0687593		0.211513	-0.0877973	0.252579	0.666667	0.246867			1	0.0246785	-0.189473	0.1267	2.33333		0.00884956	0.159733	-0.150307	NA
-0.0856844	0.0389802	-0.312812	-0.633028	0.0979228		0.148019	-0.245215	-0.209389	1.09016	0.2249			0.627907	0.088947	0.0141906	0.151481	1.75		-0.26087	-0.0299171	0.102565	NA
-0.166667	0.0280968	-0.19863	-0.722222	-0.123314		0.266667	0.0183846		1.0922	0.439909			0.324324	0.231565	-0.220771	0.16965	2.33333		-0.04	0.298327	-0.327596	NA
-0.047619	-0.0525079	0.871289	-0.646465	-0.427083		0.18896	-0.018484		1.00321	0.448517			0.85567	-0.0679955	0.0290415	0.202392	2.33333		-0.0351438	-0.214355	1.00437	NA
-0.395833	0.176154	0.324125	-0.20765	-0.0804598		0.22142	0.220869		0.629213	0.153846			0	-0.00850978	0.0635875	0.158072	2.33333		-0.29	-0.0963229	0.113229	NA
-0.281609	0.0895039	0.366991	-0.889706	-0.145022		0.0191847	-0.11466		1.44444	0.408046			-0.360656	0.123324	0.0441831	0.160261	2.33333		-0.141176	0.0259113	-0.0360029	NA
-0.465409	-0.0309103	0.44401	-0.814815	-0.0653153		0.195175	0.0603521		0.885645	0.763566			0.0769231	0.473842	-0.158497	0.115858	1.85714		-0.387755	0.137988	-0.00513786	NA
-0.112903	-0.222733	-0.293609	-0.222222	-0.367816		0.431373	0.221359		0.0416667	0.842105			0.886792	0.125284	0.0064816	0.106957	1.6		-0.265487	-0.0455313	0.631203	NA
-0.0644258	-0.134105	-0.287149	-0.307229	-0.0909091		0.230937	-0.00635393		0.287879	-0.0196078			-0.232143	-0.056171	0.101677	0.182528	1.2		-0.0909091	-0.0980356	0.168721	NA
-0.253731	0.244145	-0.0023043	-0.220779	0		0.0381862	0.343538		1.06395	0.630435			0.714286	-0.205584	-0.0733425	0.174284	1.2		-0.0348259	-0.298095	0.0387833	NA
-0.279732	0.0343582		-0.129032	-0.0755735		0.0314208	0.0203298		0.314554	0.352201			0.565217	0.123645	-0.212182	0.157508	1.2		-0.322581	-0.190602	0.177382	NA
-0.128205	-0.246536		-0.408602	0.0416667		0.177083	0.129998		0.128205	-0.156977			0.212121	0.478105	0.32996	0.0250696	-0.539033		-0.222222	-0.408913	-0.224711	NA
-0.0286094	-0.300282		-0.0100251	0.169457		0.0858586	-0.022577		0.840278	0.438596			1.42105	-0.0286186	-0.173744	0.0249359	-0.469027		-0.322581	-0.025608	0.000297791	NA
-0.185185	0.153192		-0.227053	0.333333		0.104762	0.0149465		-0.00259909	-0.444444			0.77305	0.0967749	0.105364	0.183956	1.2		-0.245283	0.193991	0.150873	NA
-0.251412	-0.275673		0.025641	0.315789		0.0651629	-0.0156055		0.111111	0.428571			-0.185185	0.340672	-0.0464903	0.177719	0.412844		-0.25	0.0296478	0.205392	NA
-0.057971	-0.0209522		-0.88604	0.0128913		0.169978	0.199283		2.21212	-0.0468037			2.04255	0.130254	0.354146	0.172475	1.3		-0.461538	0.00991719	0.0151494	NA
-0.423077	-0.142639		-0.794521	-0.0529532		0.262887	-0.342996		1.10256	0.354839			-0.210526	0.586381	0.0604161	0.16085	1.2		-0.333333	0.0497833	-0.0161216	NA
-0.143519	-0.0818072		0.367521	-0.115044		0.245318	0.123771		2.00366	-0.013468			0.166667	0.00854459	0.134953	0.160799	1.09524		-0.557692	0.259565	0.191656	NA
0.091954	-0.0858991		0.047619	-0.047619		0.461295	-0.252607		0.0968661	0.203704			1.09524	0.320448	-0.0977201	0.181069	1.2		-0.637931		0.156541	NA
-0.289733	-0.0306664		-0.342105	0.217949		0.347403	0.137606		0.409214	0.0634921			1.21053	0.26141	-0.087958	0.150838	1.2		0.314286		0.201558	NA
-0.171908	-0.142879		-0.236111	-0.180791		0.142276	-0.0655027		1.27053	0.178756			0.333333	1.31775	0.128172	0.158459	-0.043771		-0.27619		-0.0264272	NA
-0.0817152	-0.130372		-0.501916	0.30303		0.0230723	0.151621		2.33333	0.169065			0.268293	0.114736	-0.159508	0.114481	1.3619		-0.685714		-0.143176	NA
0.0210623	-0.0960772		-0.200385	-0.196735		0.40264	0.110605		2.67284	0.0947867			-0.198238	0.0482329	-0.0431483	0.167803	-0.569343		0.05		-0.267048	NA
-0.0998839	-0.0489407		-0.257426	-0.250559		0.00591716	-0.213714		0.796875	0.0376492			0.354839	0.0984115	-0.0862347	0.165487	-0.241026		-0.0869565		0.00376672	NA
-0.00212314	-0.0446944		-0.100877	-0.162679		0.277985	-0.0146421		0.3125	-0.0121581			0.481481	0.149263	0.1285	0.0960731	0.727273		-0.333333		0.0332539	NA
-0.0381944	0.198702		0.0416667	-0.364035		0.12069	0.111895		0.627907	-0.00990099			2	0.0404637	0.0235349	0.220892	1.90909		-0.261538		0.350607	NA
-0.0268456	-0.163372		0.169872	-0.123414		0.164835	0.291905		0.0635965	0.0652921			-0.106383	0.271213	0.0303234	0.17484	-0.176471		-0.617391		0.287939	NA
-0.0360046	0.14627		0.521739	0.157895			0.109225		1.60606	0.282051			-0.0232558	-0.0898277	0.0386456	0.157849	-0.269841		0.024		0.103754	NA
0.0204991	-0.219595		-0.18239	-0.5625			0.299271		0.626016	0.608187			-0.692308	0.195847	0.390965	0.0244324	1.27273		-0.675926		-0.00630371	NA
-0.0111643	-0.185766		0.00660066	-0.290123			-0.0531525		2.93333	0.240799			-0.447368	0.0887885	0.219935	0.246365	-0.485149		0.354839		0.0795848	NA
-0.0412979	-0.0633732		0.347518	-0.307116			-0.262694		0.363636	0.325758			-0.354839	0.0208317	-0.0586343	0.180031	-0.582492		-0.184211		0.254423	NA
0.09375	0.100334		-0.0755208	-0.215686			0.0639396		0.219512	0.583333			-0.712329	0.0996622	-0.0464093	0.178197	-0.445026		0.455882		-0.0167349	NA
-0.153646	0.0230969		-0.301075	-0.00193798			0.127543		0.0964912	0.185185			-0.416667	0.069924	0.758273	0.218128	-0.524904		-0.475
-0.0591398	-0.126537		-0.152855	-0.274376					0.869919	0.52381			-0.0909091	-0.0575863	0.380963	0.23877	-0.542289		-0.548387
-0.0883978	0.155499		0.449275	-0.268293					0.148148	0.345029			-0.146154	-0.0183602	0.13714	0.141264	2.9		1.58427
-0.0807175	0.233074		-0.198473	0.00323625					0.822222	0.338583			-0.459627	0.214823	0.265855	0.184678	-0.469565		-0.047619
-0.0641918	-0.0780726		-0.0277778	-0.444444					0.893939	0.195104			-0.575342	0.0314266	-0.0483922	0.195769	0.209302		-0.42029
-0.0510367	-0.310658		0.235955	-0.496855					0.408308	-0.180328			-0.602339	-0.02436	0.0708023	0.0976181	0.278689		-0.616
0.15	0.0408874		0.212121	-0.156379					0.25	0.125541			-0.671795	0.146021	-0.0826825	0.159729	1.38095		-0.42029
-0.0318389	0.0917071		-0.0248227	-0.113475					1.11111	1.41935			-0.721519		0.0100178	0.162577	1.34783		-0.52381
-0.186992	-0.121262		-0.0322581	-0.502165					0.831832	0.813725			0.630435		0.0477046	0.120415	-0.351852		0.0461538
-0.0697674	0.0998148		0.121495	-0.592593					0.290323	0.231884			-0.0909091		0.193831	0.168117	-0.320388		0.137255
-0.0768278	0.219797		-0.0740741	-0.387755					0.363636	0.0987654			0.82906		0.0939582	0.192624	-0.367347		-0.192308
-0.123656	0.030284		0.111111	-0.132883					-0.0367621	0.710526			2.63636		0.272639	0.103448	-0.15493		0.571429
-0.140687	0.116617		0.34058	-0.244792					0.150472	0.246077			-0.695035		0.255753	0.121167	1.70588		-0.60625
-0.166667	0.112829		-0.173611	0.0404624					0.070922	-0.00297619			-0.751111			0.10423	1.55556		0.0769231
0.0506051	-0.0826487		-0.153195	-0.157509					0.212121	0.0416667			-0.380875			0.233891	-0.50838		-0.76
-0.0507437	0.130368		0.0403727	-0.641577					0.527778	-0.117647			1.22222			0.184496	1.59259		-0.183673
-0.0988372	-0.0722929		0.238532	-0.0514184					2.64754	0.284722			0.285714			0.175931	1.76923		0.0736842
-0.0339426	-0.0128773		0.25	-0.216216					1.73585	0.0912698			0.137931			0.147316	2.95745		-0.436314
-0.0409483	0.0693776		-0.0972222	-0.431373					0.585366				2.81818			0.160074	0.0810127		0.0697674
-0.0138626	0.0918883		0.380779	0.162791					0.210526				1.85714			0.186085	2		0.136364
-0.0764674	0.00620147		-0.369369	-0.0647482					0.382979				1.35294			0.16544	0.0769231		0.724138
-0.0117994			0.00378788	-0.236559									-0.694444			0.178397	1.94737		-0.04
0.00566572			0.111111	-0.557292									-0.495146			0.149563	2.11111		-0.185185
0.0316092			-0.154229	-0.352941									0.631579			0.164562	1.47059		-0.127273
-0.0301548			-0.34551	-0.292929									0.538462			0.109153	1.19048		0.315789
0.000848176			-0.20148	-0.4									0.586207			0.131393	-0.333333		0.230769
0.037037			-0.279207	-0.0786749									0.333333			0.134793	1.19048		-0.0625
0.0622711			-0.239905	-0.303797									0.111111			0.212308	0.0232558		-0.263158
-0.121486			0.0703364	-0.4									0.336735			0.158343	1.42105		0.916667
-0.045977			-0.242424	-0.74359									0.0666667			0.158388	-0.323529
-0.0845886			-0.144022	-0.722222									0.0441176			0.147362	-0.588652
-0.0310078			0.0231317	-0.761905									1.35294			0.119297	-0.113924
0.0162602			-0.302536	-0.161793									-0.267516				1.44444
			-0.186176	-0.408602									1.35294				-0.324675
			0.0990338	-0.171717									0.666667				-0.557047
			-0.227053	-0.25									-0.0697674				1.15504
			-0.0513834	-0.387755									0.481481				-0.421769
			-0.316038	-0.728682									1.9697				-0.331797
			-0.0346084	-0.171779									0.290323				0.149123
			-0.0714286	-0.408602									-0.425				0.11039
			-0.196643	-0.467213									0.272727				0.228188
				0									0.818182				1.36036
				-0.309524									0.538462				0.863636
				-0.369369									0.904762				1.58824
				-0.166667									1.22222				0.695906
				0.059322									-0.738562				0.298246
				-0.56621									-0.806763				-0.396226
				-0.274448									0.142857				0.851852
				-0.468391									-0.452055				1.71429
				-0.259259									-0.649123				1.59055
				-0.315789									-0.653846				0.515152
				-0.260753									-0.667832				1.82143
				-0.707602									-0.796954				1.72093
				0.0763889									-0.755486				1.76692
				-0.412331									-0.355556				1.93023
				-0.403292									-0.442308				-0.459649
				-0.245169									-0.584158				-0.532584
				-0.377104									-0.6				1.83019
				-0.553991									0.0740741				0.568465
				0.0752688									0.45				2.42857
				-0.314721									-0.236842				-0.376812
				-0.338235									0.192308				-0.337209
				-0.619883									-0.533679				-0.176471
				-0.249668									1.47059				-0.393939
				-0.38172									-0.269841				-0.422819
				-0.329502									0.166667				-0.566766
				-0.410681									0.0952381				-0.478261
				-0.535256									0.0769231				-0.476563
				-0.234621									-0.693431				-0.558559
				-0.424242									0.921875				-0.667145
				0.296296									-0.727554				-0.127469
				-0.575758									-0.708543				1.54545
				-0.312354									-0.45098				1.43396
				0.384335									-0.328				2.11111
				-0.444444									0.538874				-0.142857
				-0.413333									-0.175				2.83333
				-0.281609									1.47059				1.96875
				-0.634703									0.481481				2.91304
				-0.364035									0.666667				0.786408
				0.143617									0.142857				1.25581
				-0.509804									-0.814346				0.596491
				-0.509804									-0.752665				0.393617
				-0.509804									1.31579				0.68
				-0.509804									0.372093				2.40351
				-0.00673401									1.82353				0.202797
				-0.109347									0.705882				-0.0809399
				0.114286									-0.0875332				0.473684
				-0.333333									0.555556				0.211823
				0.180556									1.70588				1.07477
				-0.320988									1.02963				1.19355
				-0.266667									1.70588				0.902913
				0.0351271									1.38095				1.20144
				-0.166667									0.321429				1.10753
				-0.143302									1.38095				0.95
				-0.0513627									1.38462				1.60465
				-0.0640394									1.22222				0.980769
				-0.0484564									0.84				2.84127
				-0.0792541									0.636364				1.41958
				0.0743134									2.2381				1.71667
				-0.0638963									1				1.33708
				-0.0363815									1.52632				0.440476
				-0.00780379									1.42105				0.0253165
				-0.262821									1.21053				0.56391
				-0.0591398									0.615385				0.263682
				0.0655738									0.909091				1.68571
				-0.266055									0.3125				0.405405
				-0.0676568									0.3125				1.44706
				0.0580913									-0.222222				1.41758
													0.68				1.42222
													0.166667				1
													0.05				1.05556
													0.5				0.757009
													1				0.365517
													-0.323232				0.714286
													2.92857				-0.146277
													0.45				2.68627
													2.40741				0.736842
													-0.142857				0.716981
													0.84				0.719008
													-0.461538				1.54545
													-0.0869565				1
													-0.0212766				-0.161826
													0.1				2.36364
													0.0731707				2.81818
													1.27273				3
													0.190476				1.51852
													0.419355				0.915789
													-0.603306				1.20561
													-0.477273				1.68182
													0.363636				0.78125
													0.652174				-0.0425532
													0.285714				1.25806
													1.88				0.772455
													1.4				-0.0594406
													0.491443				0.569811
													0.61194				-0.107612
													0				1.07595
													-0.545455				1.60952
													-0.25				0.644231
													-0.460674				0.84456
													-0.229358				1.4065
													0.76				1.95312
													0.728814				1.05096
													1.1				2.43284
													0.75				1.69767
													-0.302491				2.90625
													0.909091				0.0463576
													-0.243243				0.208889
													-0.0212766				-0.0153173
													-0.427523				1
													1				0.530769
													0.531915				0.198718
													-0.035461				0.921569
													1.14634				1.21429
													1.125				1.98851
													2.11111				2.0099
													2.31034				1.69444
													-0.0833333				0.0526316
													1.21053				0.980392
													0.5				0.225806
													1.21053				0.986928
													0.354839				-0.274576
													0.219512				-0.20381
													0.136364				0.766562
													-0.127273				1.49102
													0.268293				0.365605
													0.909091				0.179487
													0.909091				1.44444
													0.833333				0.764706
													1.21053				0.227642
													-0.425101				-0.0514905
													1.14876				0.60095
													-0.212121				0.476636
													1.05128				0.327217
													0.828571				0.326271
													1.45161				-0.00946372
													1.2963				0.148936
													0.5				-0.0355731
													1.66667				1.30769
													2.26316				0.211129
													1.5				1.34965
													1.78261				0.693182
													1.35714				0.561462
													0.297297				0.833333
													0.25641				0.588235
													1.06897				0.954082
													0.333333				0.664207
													0.726027				0.945205
													0.365854				0.175758
													1.56716				-0.0838926
													0.846154				0.527638
													0.61039				0.230769
													0.408696				1.15517
													0.0434783				0.649351
													0.791045				0.63913
													1.30435				0.754601
													-0.313433				0.702703
													-0.348315				0.700441
													0.176471				-0.0570902
													0.137931				0.734375
													0.111111				0.356725
																	0.480144
																	0.393103
																	-0.0797386
																	2.3617
																	0.622642
																	0.6
																	1.45455
																	1.11511
																	1.11024
																	-0.100478
