# Supplementary material for: Variation of connectivity across exemplar sensory and associative thalamocortical loops in the mouse
Source: eLife. 2020 Oct 26;9:e62554. doi: 10.7554/eLife.62554 (PMC7644223; doi:10.7554/eLife.62554)
Supplement: Figure 1—source data 1. [file elife-62554-fig1-data1.xlsx]

## Sheet: Sheet1
	Delta Change in Firing Rates Normalised to Baseline (%)
MD	MGB		PL-RS	A1-RS		PL-FS	A1-FS
109.35	33.3333		5.1374	14.2857		211.594	-39.1026
84.9315	119.355		26.9608	45.4545		91.0569	15.873
68.0441	60		-7.7381	20		66.6667	-38.6243
86.1314	69.0141		-5.40541	-15.7895		97.3684	-20.9524
94.704	100		-3.125	166.667		107.483	-53.3333
73.3333	50		28.6353	2.04082		58.5366	50
85.3333	20		-8.04598	33.3333		68.8034	-53.1915
70.9845	75		-5.22876	100		66.6667	-68.254
109.402	166.667		-12.7838	-93.8144		20.3704	-64.7059
0.694444	140.741		36.1257	-97.4026		81.8182	-25.5172
10.4869	142.308		-0.990099	-93.2432		43.4109	-38.3333
10.6195	20		11.1111	-100		66.6667	2.85714
76.3441	72.7273		-30.4734	-95.6522		14.1304	-66.1017
64.6586	33.3333		-43.9153	55.7522		9.77564	-40.2597
22.4189	-18.0328		-7.40741	16.5312		9.25926	-44.4444
24.2138	137.64		1.5625	70.4918		1.74029	-14.5729
48.5043	110		-15.0066	69.697		10.8247	50
82.7485	-74.0977		-0.442478	14.2857		15.942	-4.95868
31.3131	166.667		-17.2772	166.667		12.6126	-33.3333
16.4875	300		-10.2564	140		8.73694	-7.04846
83.1832	0		-16.3373	100		21.1513	0.884956
38.2576	166.667		-8.56844	62.7907		14.8019	-26.087
22.1264	33.3333		-16.6667	32.4324		26.6667	-4
16.4875	112.5		-4.7619	85.567		18.896	-3.51438
35.5556	49.5327		-39.5833	0		22.142	-29
0	-45.4545		-28.1609	-36.0656		1.91847	-14.1176
55.4054	100		-46.5409	7.69231		19.5175	-38.7755
12.3596	47.6923		-11.2903	88.6792		43.1373	-26.5487
3.82514	191.304		-6.44258	-23.2143		23.0937	-9.09091
17.7536	57.5758		-25.3731	71.4286		3.81862	-3.48259
0	24.3243		-27.9732	56.5217		3.14208	-32.2581
16.9591	-53.1532		-12.8205	21.2121		17.7083	-22.2222
28.7129	26.6667		-2.86094	142.105		8.58586	-32.2581
19.5652	64.0625		-18.5185	77.305		10.4762	-24.5283
16.4875	-39.0244		-25.1412	-18.5185		6.51629	-25
27.3408	-60.7143		-5.7971	204.255		16.9978	-46.1538
29.386	35.4839		-42.3077	-21.0526		26.2887	-33.3333
37.2549	91.6667		-14.3519	16.6667		24.5318	-55.7692
20.3704	23.5294		9.1954	109.524		46.1295	-63.7931
63.8418	73.913		-28.9733	121.053		34.7403	31.4286
61.0738	-34.375		-17.1908	33.3333		14.2276	-27.619
51.9862	-45.2055		-8.17152	26.8293		2.30723	-68.5714
34.8039	-25.9259		2.10623	-19.8238		40.264	5
66.6667	-16		-9.98839	35.4839		0.591716	-8.69565
52.648	20		-0.212314	48.1481		27.7985	-33.3333
49.0385	-5.74713		-3.81944	200		12.069	-26.1538
43.8356	16.2791		-2.68456	-10.6383		16.4835	-61.7391
89.528	-6.97674		-3.60046	-2.32558		14.1302	2.4
83.9623	35.4839		2.04991	-69.2308		-23.0953	-67.5926
110.094	0		-1.11643	-44.7368		13.0832	35.4839
25.3444	131.579		-4.12979	-35.4839		1.03047	-18.4211
100.68	-3.84615		9.375	-71.2329		10.4877	45.5882
76.1364	73.913		-15.3646	-41.6667		-12.6933	-47.5
76.1364	100		-5.91398	-9.09091		15.0397	-54.8387
66.6667	54.2857		-8.83978	-14.6154		5.59333	158.427
23.5955	61.2903		-8.07175	-45.9627		3.13249	-4.7619
42.5121	48.1481		-6.41918	-57.5342		4.99179	-42.029
61.6667	-86.0627		-5.10367	-60.2339		5.13453	-61.6
29.6296	-40.7407		15	-67.1795		-17.8066	-42.029
42.5121	55.5556		-3.18389	-72.1519		6.19041	-52.381
61.6667	15		-18.6992	63.0435		4.71418	4.61538
29.6296	-14.5833		-6.97674	-9.09091		8.48946	13.7255
91.1315	57.1429		-7.68278	82.906		-2.09462	-19.2308
101.299	65.5172		-12.3656	263.636		11.6978	57.1429
91.1315	75		-14.0687	-69.5035		5.2861	-60.625
101.299	207.692		-16.6667	-75.1111		-11.6447	7.69231
32.1138	-68.6567		5.06051	-38.0875		21.6908	-76
66.6667	-53.4884		-5.07437	122.222		-8.77973	-18.3673
32.1138	73.913		-9.88372	28.5714		-24.5215	7.36842
66.6667	166.667		-3.39426	13.7931		1.83846	-43.6314
45.5696	48.7179		-4.09483	281.818		-1.8484	6.97674
94.8357	-65.8915		-1.38626	185.714		22.0869	13.6364
50.5376	12.8205		-7.64674	135.294		-11.466	72.4138
76.0753	-69.4444		-1.17994	-69.4444		6.03521	-4
-7.64331	-41.6667		0.566572	-49.5146		22.1359	-18.5185
65.2893	-32.2581		3.16092	63.1579		-0.635393	-12.7273
79.6636	-25		-3.01548	53.8462		34.3538	31.5789
73.0361	-51.2195		0.0848176	58.6207		2.03298	23.0769
87.8109	73.913		3.7037	33.3333		12.9998	-6.25
140.196	82.6087		6.22711	11.1111		-2.2577	-26.3158
89.1304	61.5385		-12.1486	33.6735		1.49465	91.6667
82.8358	60		-4.5977	6.66667		-1.56055	-2.6593
71.4976	-78.6802		-8.45886	4.41176		19.9283	-13.2625
96.2025	-80.0995		-3.10078	135.294		-34.2996	13.8844
87.3706	90.4762		1.62602	-26.7516		12.3771	-2.28885
71.4286	73.913		31.6915	135.294		-25.2607	-7.16466
75.5556	81.8182		-1.09701	66.6667		13.7606	42.2734
71.8346	-49.3671		-8.95509	-6.97674		-6.55027	-15.4111
104.545	-25.4237		8.55835	48.1481		15.1621	-9.19326
129.825	-29.8246		3.59814	196.97		11.0605	18.5996
112.56	42.8571		27.739	29.0323		-21.3714	-11.5826
81.9923	90.4762		-2.36511	-42.5		-1.46421	-2.73351
28.2051	66.6667		-21.5463	27.2727		11.1895	13.9781
38.5185	110.526		-16.8107	81.8182		29.1905	-10.6897
84.466	73.913		5.97955	53.8462		10.9225	8.12445
89.8148	48.1481		8.16959	90.4762		29.9271	22.5574
81.4815	81.8182		-3.34766	122.222		-5.31525	-0.449616
99.6124	33.3333		-30.0733	-73.8562		-26.2694	8.86576
61.2022	73.913		-2.27635	-80.6763		6.39396	4.14782
74.0741	110.526		15.9227	14.2857		12.7543	17.1337
76.8707	177.778		2.22093	-45.2055		15.3837	12.8967
66.6667	67.2727		-15.139	-64.9123		15.889	15.9733
97.318	25		-16.7614	-65.3846		2.32958	-2.99171
82.5902	-28.5714		-9.95454	-66.7832		23.9731	29.8327
53.6458	48.1481		9.34317	-79.6954		5.7223	-21.4355
24.5211	60		-5.51418	-75.5486		9.12373	-9.63229
59.5238	60		3.89802	-35.5556		-4.2072	2.59113
63.1016	66.6667		2.80968	-44.2308		-6.45043	13.7988
68.2692	26.1905		-5.25079	-58.4158		5.55811	-4.55313
59.1221	66.6667		17.6154	-60		12.0671	-9.80356
23.1884	42.8571		8.95039	7.40741		16.5141	-29.8095
58.046	53.8462		-3.09103	45		-2.03634	-19.0602
75	53.8462		-22.2733	-23.6842		2.61646	-40.8913
96.2617	60		-13.4105	19.2308		42.072	-2.5608
37.8026	-85.5596		24.4145	-53.3679		47.4366	19.3991
87.9085	-46.6667		3.43582	147.059		18.6262	2.96478
54.955	-49.3671		-24.6536	-26.9841		8.19289	0.991719
57.7236	-85.3503		-30.0282	16.6667		-4.49527	4.97833
52.9915	-81.6514		15.3192	9.52381		8.88865	25.9565
73.1123	-73.8562		-27.5673	7.69231		-0.798378	23.0374
54.8556	23.5294		-2.09522	-69.3431		25.2579	19.1508
55.914	-52.9412		-14.2639	92.1875		-20.9389	31.9821
74.7475	-86.6221		-8.18072	-72.7554		82.0331	10.7885
72.2533	29.0323		-8.58991	-70.8543		206.202	-15.0705
69.7248	83.3333		-3.06664	-45.098		78.6571	9.42492
86.9565	17.6471		-14.2879	-32.8		208.824	-12.4033
104.762	82.6087		-13.0372	53.8874		120.513	4.06392
93.2624	2.5641		-9.60772	-17.5		37.037	-6.55716
60.0877	-16		-4.89407	147.059		184.314	-20.7296
85.9649	81.8182		-4.46944	48.1481		48.0815	-9.64398
67.7215	110.526		19.8702	66.6667		187.037	-13.6578
88.2952	110.526		-16.3372	14.2857		201.075	-9.51832
69.5906	90.4762		14.627	-81.4346		119.298	-31.9407
60.7143	53.8462		-21.9595	-75.2665		48.7179	5.1201
95.5128	66.6667		-18.5766	131.579		109.877	-2.31083
40.1515	41.9355		-6.33732	37.2093		29.4326	38.8975
68.6747	60		10.0334	182.353		284.615	-6.44792
65.1515	73.913		2.30969	70.5882		48.8095	-10.219
69.5402	90.4762		-12.6537	-8.75332		108.333	-13.4475
71.9577	110		15.5499	55.5556		28.2407	-15.0307
65.0165	81.8182		23.3074	170.588		-24.5495	10.2565
60.3376	90.4762		-7.80726	102.963		4.58839	-32.7596
45.6876	73.913		-31.0658	170.588		66.6667	100.437
63.6086	73.913		4.08874	138.095		109.016	11.3229
68.1159	11.1111		9.17071	32.1429		109.22	-3.60029
55.5556	-30.6931		-12.1262	138.095		100.321	-0.513786
77.7778	92.3077		9.98148	138.462		62.9213	63.1203
70.7819	158.824		21.9797	122.222		144.444	16.8721
32.9787	55.5556		3.0284	84		88.5645	3.87833
74.7126	71.4286		11.6617	63.6364		4.16667	17.7382
57.4074	-13.7157		11.2829	223.81		28.7879	-22.4711
48.9676	210.345		-8.26487	100		106.395	0.0297791
78.3626	122.222		13.0368	152.632		31.4554	15.0873
35.3014	53.8462		-7.22929	142.105		12.8205	20.5392
85.8974	60		-1.28773	121.053		84.0278	1.51494
35.8025	-29.8246		6.93776	61.5385		-0.259909	-1.61216
83.1502	5		9.18883	90.9091		11.1111	19.1656
81.07	37.931		0.620147	31.25		221.212	15.6541
76.8293	81.8182		-11.8213	31.25		110.256	20.1558
44.2786	60		-13.7236	-22.2222		200.366	-2.64272
74.6988	83.6735		-31.899	68		9.68661	-14.3176
56.5657	121.053		7.60298	16.6667		40.9214	-26.7048
99.6124	100		-27.4994	5		127.053	0.376672
75.6757	31.4286		-37.1739	50		233.333	3.32539
84.1085	50		-3.07665	100		267.284	35.0607
59.8639	35.9223		-43.1095	-32.3232		79.6875	28.7939
52.5822	92.3913		-31.6772	292.857		31.25	10.3754
79.6875	46.3918		-15.8382	45		62.7907	-0.630371
43.0976	100		-69.6712	240.741		6.35965	7.95848
104.955	138.095		-47.7999	-14.2857		160.606	25.4423
94.1176	152.632		-14.0496	84		62.6016	-1.67349
62.8788	140		3.17364	-46.1538		293.333	6.93069
32.6923	109.091		-41.8224	-8.69565		36.3636	88.5714
91.1765	64.2857		7.31181	-2.12766		21.9512	-32.6923
97.1326	177.778		20.1206	10		9.64912	-9.58904
124.806	-40		26.4081	7.31707		86.9919	-8.08081
242.593	-27.5		0.272249	127.273		14.8148	136.364
106.573	155.556		-24.5075	19.0476		82.2222	6.97674
101.807	84		-37.7218	41.9355		89.3939	28.125
163.789	155.556		-31.2812	-60.3306		40.8308	65.2174
81.713	155.556		-19.863	-47.7273		25	104.444
173.284	170.588		87.1289	36.3636		111.111	-29.6
113.964	155.556		32.4125	65.2174		83.1832	172.727
100.913	155.556		36.6991	28.5714		29.0323	28.4404
111.864	60		44.401	188		36.3636	17.6471
141.228	150		-29.3609	140		-3.67621	-23.4043
77.5701	155.556		-28.7149	49.1443		15.0472	-40.8219
104.62	155.556		-0.23043	61.194		7.0922	-42.7083
71.3836	166.667		9.14454	0		21.2121	209.091
167.094	177.778		21.2963	-54.5455		52.7778	46.6667
149.02	37.1429		6.22711	-25		264.754	-24.6154
82.0513	55		-9.33333	-46.0674		173.585
89.0547	184.211		35.5759	-22.9358		58.5366
49.4624	70.3704		17.284	76		21.0526
119.577	100		-15.2381	72.8814		38.2979
90.9091	154.545		-0.337838	110		62.1622
99.4949	-32.3944		-24.0991	75		29.6296
112.418	158.824		-77.2727	-30.2491		15.6821
57.7909	100		-26.9663	90.9091		9.86733
84.3137	75		-26.6667	-24.3243		20.2381
56.7329	2.22222		-68.75	-2.12766		21.118
86.6667	41.1765		85.7143	-42.7523		48.3051
79.3249	117.391		16.4384	100		32.0346
94.8718	113.333		-38.0952	53.1915		57.8947
59.7222	15		-91.7695	-3.5461		22.5854
83.3333	55.0562		84.6847	114.634		17.8571
142.616	32.2581		-34.8659	112.5		3.50448
87.5	85.7143		7.14286	211.111		23.9496
98.9247	131.579		-49.1525	231.034		30.137
124.638	54.8387		-63.3028	-8.33333		26.1905
92.4603	24.3243		-72.2222	121.053		14.1176
83.1683	-38.8889		-64.6465	50		-10.2564
72.5352	-8.82353		-20.765	121.053		25.4682
117.3	-7.04225		-88.9706	35.4839		32.7434
116.667	102.632		-81.4815	21.9512		23.0907
81.8182	7.07071		-22.2222	13.6364		24.6867
54.5139	57.4468		-30.7229	-12.7273		22.49
100.647	100		-22.0779	26.8293		43.9909
96.2366	248.148		-12.9032	90.9091		44.8517
120	5.67121		-40.8602	90.9091		15.3846
47.0588	75		-1.00251	83.3333		40.8046
111.009	28.8991		-22.7053	121.053		76.3566
16.208	33.234		2.5641	-42.5101		84.2105
0	87.7551		-88.604	114.876		-1.96078
92.9012	8.47458		-79.4521	-21.2121		63.0435
80.8511	91.0448		36.7521	105.128		35.2201
63.3333	265.714		4.7619	82.8571		-15.6977
87.7023	138.554		-34.2105	145.161		43.8596
139.583	134.783		-23.6111	129.63		-44.4444
73.7589	251.724		-50.1916	50		42.8571
51.9608	102.532		-20.0385	166.667		-4.68037
2.01149	278.947		-25.7426	226.316		35.4839
16.4875	147.619		-10.0877	150		-1.3468
66.6667	85.4839		4.16667	178.261		20.3704
53.8978	245.263		16.9872	135.714		6.34921
57.8947	264.286		52.1739	29.7297		17.8756
74.3056	300		-18.239	25.641		16.9065
111.934	169.565		0.660066	106.897		9.47867
61.0306	194.737		34.7518	33.3333		3.76492
77.2824	-20.7921		-7.55208	72.6027		-1.21581
142.647	-28.3019		-30.1075	36.5854		-0.990099
112.644	-24.3902		-15.2855	156.716		6.52921
110.623	77.4648		44.9275	84.6154		28.2051
151.082	217.647		-19.8473	61.039		60.8187
30.2083	100		-2.77778	40.8696		24.0799
44.3089	14.2857		23.5955	4.34783		32.5758
-40.0044	-23.7113		21.2121	79.1045		58.3333
-20.58	18.3099		-2.48227	130.435		18.5185
8.51564	227.157		-3.22581	-31.3433		52.381
-39.4708	10.7365		12.1495	-34.8315		34.5029
99.3175	188.406		-7.40741	17.6471		33.8583
27.1589	93.4426		11.1111	13.7931		19.5104
2.5613	-5.46697		34.058	11.1111		-18.0328
54.4332	180		-17.3611	9.13908		12.5541
31.0173	164.516		-15.3195	-10.9023		141.935
-24.9039	91.4894		4.03727	-9.47841		81.3725
23.6625	62.7907		23.8532	-21.4863		23.1884
-23.6848	191.228		25	18.6958		9.87654
14.4356	252.941		-9.72222	15.3551		71.0526
-27.5219	100		38.0779	5.49649		24.6077
0.147343	215.789		-36.9369	10.8176		-0.297619
-0.495318	236.842		0.378788	20.5825		4.16667
-5.98451	100		11.1111	11.8188		-11.7647
12.954	51.1111		-15.4229	15.765		28.4722
9.58712	178.261		-34.551	2.21622		9.12698
2.30761	29.0323		-20.148	-16.0733
8.82499	71.1048		-27.9207	10.4643
20.2244	130.769		-23.9905	-28.3469
41.5596	-1.63067		7.03364	7.49736
42.2695	217.021		-24.2424	-7.98898
6.64244	14.2857		-14.4022	8.13792
17.9918	4.92958		2.31317	-24.8848
-9.63559	131.818		-30.2536	12.1335
3.18182	106.897		-18.6176	2.46785
-5.46047	181.481		9.90338	8.8947
8.60643	213.924		-22.7053	23.1565
14.1853	274.545		-5.13834	-6.79955
-27.2259	300		-31.6038	-0.850978
8.10505	185.714		-3.46084	12.3324
4.81566	87.0968		-7.14286	47.3842
39.681	115.385		-19.6643	12.5284
-0.838561	145.455		-29.2237	-5.6171
8.79337	-52.5		-3.3189	-20.5584
-7.52274	-48.3871		-9.34066	12.3645
1.58102	142.105		-8.49673	47.8105
23.0465	-53.7688		-18.1287	-2.86186
-2.53899	-48.4716		-15.3005	9.67749
13.1523	-32.3529		-8.42491	34.0672
12.3536	-39.759		-13.8486	13.0254
-15.3018	-4.91803		12.4031	58.6381
3.20977	121.053		2.49042	0.854459
-1.91336	-41.2698		8.15603	32.0448
13.9814	87.7729		-44.4444	26.141
-0.0702093	167.188		15.2778	131.775
-9.29431	112.834		-2.38095	11.4736
22.2384	230.435		3.29861	4.82329
7.04727	150		12.4031	9.84115
-4.9572	25.3012		-1.7341	14.9263
	-25.6198		-39.528	4.04637
	-7.86517		-19.7422	27.1213
	-15.3846		3.51377	-8.98277
	70.9677		6.87593	19.5847
	45.8333		9.79228	8.87885
	146.729		-12.3314	2.08317
	156.566		-42.7083	9.96622
	16.5049		-8.04598	6.9924
	98.3784		-14.5022	-5.75863
	130.38		-6.53153	-1.83602
	42.8571		-36.7816	21.4823
	143.478		-9.09091	3.14266
	180		0	-2.436
	9.43396		-7.55735	14.6021
	33.5593		4.16667	4.32316
	275		16.9457	29.9076
	58.6569		33.3333	13.2499
	114.085		31.5789	17.1733
	63.1902		1.28913	9.20707
	135.294		-5.29532	11.8691
	183.761		-11.5044	22.3525
	146.465		-4.7619	-4.2761
	218.519		21.7949	132.221
	262.963		-18.0791	6.99725
	274.194		30.303	-3.98584
	108		-19.6735	13.8901
	79.7235		-25.0559	18.294
	73.913		-16.2679	21.4677
	74.4966		-36.4035	2.99847
	109.091		-12.3414	20.5927
	178.873		15.7895	-0.407042
	270.37		-56.25	25.8978
	175.362		-29.0123	16.3707
	85.1852		-30.7116	15.5634
	287.234		-21.5686	-18.9473
	204.11		-0.193798	1.41906
	132.787		-27.4376	-22.0771
	267.347		-26.8293	2.90415
	244.444		0.323625	6.35875
	183.582		-44.4444	4.41831
	114.545		-49.6855	-15.8497
	135.714		-15.6379	0.64816
	120		-11.3475	10.1677
	4.81283		-50.2165	-7.33425
	162.4		-59.2593	-21.2182
	195.238		-38.7755	32.996
	266.038		-13.2883	-17.3744
	250.877		-24.4792	10.5364
	211.475		4.04624	-4.64903
	72.4719		-15.7509	35.4146
	149.383		-64.1577	6.04161
	295.652		-5.14184	13.4953
	124.779		-21.6216	-9.77201
	57.6087		-43.1373	-8.7958
	295.833		16.2791	12.8172
	40.7035		-6.47482	-15.9508
	163.291		-23.6559	-4.31483
	175		-55.7292	-8.62347
	28.9149		-35.2941	12.85
	92.6471		-29.2929	2.35349
	243.284		-40	3.03234
	13.8554		-7.86749	3.86456
	201.124		-30.3797	39.0965
	247.368		-40	21.9935
	64.8		-74.359	-5.86343
	57.3333		-72.2222	-4.64093
	47.6744		-76.1905	75.8273
	55.5556		-16.1793	38.0963
	213.333		-40.8602	13.714
	201.639		-17.1717	26.5855
	188.608		-25	-4.83922
	147.17		-38.7755	7.08023
	153.333		-72.8682	-8.26825
	12.4051		-17.1779	1.00178
	260		-40.8602	4.77046
	203.704		-46.7213	19.3831
	84.8		0	9.39582
	243.333		-30.9524	27.2639
	64.1221		-36.9369	25.5753
	60.472		-16.6667	-4.86674
	173.333		5.9322	-1.75953
	207.042		-56.621	50.5089
	97.4803		-27.4448	35.4974
	-1.7341		-46.8391	8.39092
	-13.9194		-25.9259	23.6882
	109.449		-31.5789	17.931
	113.265		-26.0753	-14.8653
	4.23453		-70.7602	68.6054
	134.109		7.63889	36.5047
	290.625		-41.2331	19.802
	63.4783		-40.3292	16.9118
	45.9649		-24.5169	13.6065
	146.512		-37.7104	11.2344
	70.3349		-55.3991	15.8195
	224.272		7.52688	19.1631
	192.105		-31.4721	8.48929
	169.333		-33.8235	11.6022
	139.326		-61.9883	14.7838
	107.547		-24.9668	11.9298
	106.316		-38.172	12.67
	263.636		-32.9502	15.1481
	55.2632		-41.0681	16.965
	35.914		-53.5256	20.2392
	265.854		-23.4621	15.8072
	63.9098		-42.4242	16.0261
	51.6373		29.6296	11.5858
	85.8156		-57.5758	10.6957
	125.882		-31.2354	18.2528
	179.57		38.4335	17.4284
	196.491		-44.4444	15.7508
	116.092		-41.3333	2.50696
	179.167		-28.1609	2.49359
	95.2381		-63.4703	18.3956
	210.145		-36.4035	17.7719
	106.977		14.3617	17.2475
	40.8602		-50.9804	16.085
	87.7193		-50.9804	16.0799
	-1.17899		-50.9804	18.1069
	100		-50.9804	15.0838
	98.4615		-0.673401	15.8459
	185.246		-10.9347	11.4481
	47.1074		11.4286	16.7803
	101.504		-33.3333	16.5487
	76.5625		18.0556	9.60731
	-2.26804		-32.0988	22.0892
	155.856		-26.6667	17.484
	40.1015		3.51271	15.7849
	-12.4294		-16.6667	2.44324
	141.121		-14.3302	24.6365
	42.9719		-5.13627	18.0031
	20.0795		-6.40394	17.8197
	134.848		-4.84564	21.8128
	-2.63158		-7.92541	23.877
	27.5035		7.43134	14.1264
	43.75		-6.38963	18.4678
	19.5202		-3.63815	19.5769
	133.01		-0.780379	9.76181
	129.63		-26.2821	15.9729
	19.739		-5.91398	16.2577
	92.8571		6.55738	12.0415
	55.3623		-26.6055	16.8117
	53.8028		-6.76568	19.2624
	68.7296		5.80913	10.3448
	173.469			12.1167
	231.034			10.423
	183.099			23.3891
	16.1698			18.4496
	4.48367			17.5931
	18.3473			14.7316
	8.54789			16.0074
	26.2727			18.6085
	15.5832			16.544
	13.4255			17.8397
	11.9021			14.9563
	14.8049			16.4562
	14.0865			10.9153
	36.4383			13.1393
	33.5354			13.4793
	5.36037			21.2308
	10.6236			15.8343
	13.1323			15.8388
	13.1915			14.7362
	15.8677			11.9297
	5.73906			130
	7.67892			67.7019
	17.679			67.6471
	17.4383			21.2544
	18.7775			58.2418
	12.9097			47.7477
	16.392			68.254
	14.2938			164
	25.0777			151.282
	37.6807			86.3014
	51.0849			1.53846
	3.34076			64.7059
	-1.86787			185.714
	-7.93115			5.38642
	8.05687			242.857
	9.77103			226.316
	21.665			-14.9606
	12.766			239.13
	12.4648			-27.1028
	6.12878			181.818
	2.14317			233.333
	27.7632			175
	11.1207			233.333
	4.92719			233.333
	7.34733			233.333
	18.3012			233.333
	6.70939			185.714
	42.5271			160
	14.6359			120
	13.8795			120
	12.2998			120
	22.8785			-53.9033
	-7.5029			-46.9027
	54.1661			120
	73.8786			41.2844
	75.6245			130
	-1.57082			120
	-1.05132			109.524
	-35.5303			120
	21.1407			120
	42.1188			-4.3771
	-29.5958			136.19
	-28.1263			-56.9343
	5.71334			-24.1026
	14.2205			72.7273
	-6.46033			190.909
	25.5131			-17.6471
	28.1223			-26.9841
	16.7409			127.273
	86.6781			-48.5149
	34.7102			-58.2492
	39.0143			-44.5026
	31.7453			-52.4904
	-4.31017			-54.2289
	27.9805			290
	35.3945			-46.9565
	-20.0441			20.9302
	36.8546			27.8689
	6.58305			138.095
	7.67434			134.783
	-9.0436			-35.1852
	16.1427			-32.0388
	14.724			-36.7347
	5.27521			-15.493
	-2.94335			170.588
	-6.00579			155.556
	14.4948			-50.838
	-9.00839			159.259
	-3.22464			176.923
	-24.8808			295.745
	14.8971			8.10127
	-2.9008			200
	10.8994			7.69231
	-22.4014			194.737
	-10.0067			211.111
	-3.66536			147.059
	-7.93066			119.048
	6.37737			-33.3333
	9.75973			119.048
	3.97617			2.32558
	-26.05			142.105
	16.2026			-32.3529
	-8.02768			-58.8652
	-3.54408			-11.3924
	-8.45223			144.444
	-29.2053			-32.4675
	-22.0984			-55.7047
	26.6535			115.504
	-5.86838			-42.1769
	15.0202			-33.1797
	111.72			14.9123
	-4.27753			11.039
	1.14593			22.8188
	-29.1938			136.036
	6.65218			86.3636
	-17.2436			158.824
	12.3809			69.5906
	-0.148454			29.8246
	20.925			-39.6226
	-11.9786			85.1852
	-23.6214			171.429
	4.58171			159.055
	6.11864			51.5152
	5.67594			182.143
	-11.151			172.093
	36.5376			176.692
	-3.58515			193.023
	24.7			-45.9649
	78.0156			-53.2584
	5.44579			183.019
	12.293			56.8465
	3.25434			242.857
	26.4054			-37.6812
	1.92739			-33.7209
	-3.29219			-17.6471
	3.68494			-39.3939
	-4.04944			-42.2819
	-0.788259			-56.6766
	3.95063			-47.8261
	-16.0675			-47.6563
	-2.17687			-55.8559
	3.47713			-66.7145
	-11.0321			-12.7469
	12.6896			154.545
	4.57775			143.396
	3.19788			211.111
	6.47805			-14.2857
	14.3387			283.333
	6.01361			196.875
	4.74889			291.304
	-3.17684			78.6408
	17.2771			125.581
	-17.927			59.6491
	6.23287			39.3617
	8.37334			68
	10.5837			240.351
				20.2797
				-8.09399
				47.3684
				21.1823
				107.477
				119.355
				90.2913
				120.144
				110.753
				95
				160.465
				98.0769
				284.127
				141.958
				171.667
				133.708
				44.0476
				2.53165
				56.391
				26.3682
				168.571
				40.5405
				144.706
				141.758
				142.222
				100
				105.556
				75.7009
				36.5517
				71.4286
				-14.6277
				268.627
				73.6842
				71.6981
				71.9008
				154.545
				100
				-16.1826
				236.364
				281.818
				300
				151.852
				91.5789
				120.561
				168.182
				78.125
				-4.25532
				125.806
				77.2455
				-5.94406
				56.9811
				-10.7612
				107.595
				160.952
				64.4231
				84.456
				140.65
				195.312
				105.096
				243.284
				169.767
				290.625
				4.63576
				20.8889
				-1.53173
				100
				53.0769
				19.8718
				92.1569
				121.429
				198.851
				200.99
				169.444
				5.26316
				98.0392
				22.5806
				98.6928
				-27.4576
				-20.381
				76.6562
				149.102
				36.5605
				17.9487
				144.444
				76.4706
				22.7642
				-5.14905
				60.095
				47.6636
				32.7217
				32.6271
				-0.946372
				14.8936
				-3.55731
				130.769
				21.1129
				134.965
				69.3182
				56.1462
				83.3333
				58.8235
				95.4082
				66.4207
				94.5205
				17.5758
				-8.38926
				52.7638
				23.0769
				115.517
				64.9351
				63.913
				75.4601
				70.2703
				70.0441
				-5.70902
				73.4375
				35.6725
				48.0144
				39.3103
				-7.97386
				236.17
				62.2642
				60
				145.455
				111.511
				111.024
				-10.0478
