# Supplementary material for: Variation of connectivity across exemplar sensory and associative thalamocortical loops in the mouse
Source: eLife. 2020 Oct 26;9:e62554. doi: 10.7554/eLife.62554 (PMC7644223; doi:10.7554/eLife.62554)
Supplement: Figure 2—source data 1. [file elife-62554-fig2-data1.xlsx]

## Sheet: Maximal projection areas
		MD-->PL			MGB-->A1
	Maximal projection areas (µm²) of cortical boutons, raw data (Figure 2, panels g-h)
	PL (L1)	PL (L3)	PL (L5)	A1 (L1)	A1 (L3)	A1 (L4)	A1 (L5)
	0.58	0.74	0.67	1.74	1.22	1.47	1.65
	0.59	1.08	0.64	0.97	2	0.89	1.4
	0.79	0.5	1.09	1.08	1.22	1.19	0.67
	1.21	0.32	0.28	1.03	1.4	1.12	0.52
	0.48	0.96	0.81	0.68	0.66	0.86	1.09
	0.48	0.79	0.41	0.57	0.97	0.5	1.02
	0.26	0.81	0.4	0.73	1.37	0.67	1.02
	0.79	0.21	0.35	1.05	1.05	1.3	0.51
	0.6	1.08	1.06	0.89	0.53	0.57	0.42
	0.26	0.54	0.43	0.59	1.24	1.39	1.09
	1.22	0.98	0.38	0.47	1.15	1.15	0.7
	0.57	0.3	0.57	0.56	0.67	0.97	1
	0.23	1.21	0.68	0.72	0.68	1.3	0.97
	0.73	0.98	0.26	0.61	0.76	1.07	1.02
	0.59	0.58	0.45	1.05	0.52	0.49	1.23
	0.59	0.61	0.24	0.71	0.88	0.61	1.79
	0.84	1.22	0.85	0.34	0.65	0.9	0.62
	0.61	0.97	0.83	0.88	0.43	2.12	0.53
	0.31	0.94	1.13	0.72	0.77	1.57	0.49
	0.29	1.06	0.75	0.53	1.31	0.92	0.73
	0.25	0.59	1.16	1.63	1.08	0.41	0.43
	0.45	0.84	0.5	1.37	1.09	0.77	0.91
	0.69	2.78	0.34	0.24	0.76	3.47	1.11
	1.02	0.99	0.64	0.83	0.51	0.95	1.58
	0.38	0.53	0.36	0.91	0.92	0.74	2.25
	1.04	0.68	0.42	1.37	1.31	1.58	0.89
	0.43	0.73	0.82	1.63	0.93	1.38	0.5
	1.05	1.25	0.45	0.34	0.71	1.71	1.36
	0.61	0.97	0.51	0.88	0.53	1.29	0.8
	0.71	1.27	0.81	1.04	1.09	1.15	1.44
	0.75	0.91	0.36	0.81	0.31	1.47	2.07
	0.2	0.27	0.57	0.42	0.36	0.6	1
	0.63	0.56	0.31	0.5	0.61	0.5	1.13
	0.27	1.32	0.41	1.27	1.12	0.94	1.34
	0.83	0.56	0.85	0.4	1.14	1.8	0.53
	0.62	1.69	0.48	1.1	0.68	1.94	1.35
	0.59	0.9	0.49	0.7	1.01	1.28	0.91
	0.3	0.57	0.4	0.44	0.82	0.86	0.69
	0.64	0.84	0.22	1.2	0.79	2.27	0.92
	0.46	1.46	0.31	0.68	0.54	0.63	0.8
	0.21	0.72	0.41	1.08	0.4	1.55	0.63
	0.3	0.36	0.48	1.11	1.08	1.43	1.24
	0.32	0.87	0.55	1.04	0.74	2.42	0.34
	0.37	0.76	0.6	0.4	0.44	0.87	1.92
	0.61	0.53	0.43	0.35	1.09	0.61	2.11
	1.1	0.64	0.46	1.12	0.77	0.92	1.62
	0.29	0.77	0.84	0.91	0.6	0.94	1.16
	0.34	0.86	0.5	0.72	0.27	2.51	0.46
	0.43	1.75	0.37	0.97	0.93	0.58	0.6
	1.18	0.76	0.69	0.4	0.7	0.98	0.87
	0.31	0.78	0.48	1	1.26	1.46	0.49
	1.64	0.7	1.43	0.51	1.04	1.1	0.86
	0.27	0.63	0.77	0.38	1.61	1.66	0.73
	0.27	0.89	1.29	0.78	1.13	0.92	0.8
	0.36	1.12	0.9	0.51	1.27	0.87	0.82
	0.79	0.98	0.65	0.74	2.22	0.66	1.36
	0.72	0.3	0.6	1	1.82	1.64	0.77
	0.32	0.21	0.53	1.36	0.8	0.71	0.67
	1.09	0.46	0.65	1.66	0.86	0.45	0.76
	1.23	1.05	0.59	0.81	1.62	0.61	0.58
	0.84	0.39	0.58	0.42	1.39	1.45	0.48
	0.45	0.37	0.32	1	0.95	1.03	1.03
	0.43	0.68	0.24	1.32	0.99	1.5	0.84
	0.69	1.04	0.62	0.66	1.24	1.7	0.77
	0.42	0.75	1.02	1.1	0.95	1.22	0.6
	0.85	0.55	0.82	0.86	0.88	1.53	0.92
	0.81	0.51	0.25	0.59	1.02	0.34	0.92
	0.64	0.82	0.35	0.53	0.56	2.21	0.65
	0.2	0.31	0.62	0.53	1.15	1.31	0.55
	0.43	0.42	0.37	0.46	0.95	1.73	1.1
	0.49	0.3	0.3	2.18	1.25	2	0.64
	0.65	0.31	0.58	0.53	0.79	2.17	0.35
	0.38	0.23	1.24	0.32	0.91	2.27	0.87
	0.64	0.26	1.05	0.8	1.07	1.51	1.16
	0.4	1.24	0.54	1.14	1	1.08	0.52
	0.73	0.66	1.63	0.82	0.82	1.17	0.95
	2.06	0.7	0.24	0.67	0.49	0.47	0.81
	0.56	1.11	0.38	0.79	1.56	2.19	0.69
	1.23	0.36	0.67	0.39	1.92	1	1.04
	0.3	0.36	0.61	1.09	0.75	1.18	0.88
	0.38	0.35	0.62	1.31	0.78	1.22	0.32
	1.06	1.04	1.06	0.81	1.05	1.16	0.75
	0.56	1.47	0.55	0.25	0.61	0.47	1.03
	0.35	0.51	0.68	0.6	1.25	1.98	0.51
	0.41	0.27	0.78	0.29	0.84	2.48	1.1
	0.41	0.29	0.48	0.39	0.88	1.6	0.6
	0.58	0.81	1.14	1.13	0.51	1.07	0.91
	0.34	0.38	0.81	0.56	0.49	0.37	0.89
	1.77	1.26	0.72	0.96	0.68	0.76	0.97
	0.66	0.65	0.64	0.64	1.13	1.69	0.42
	0.85	0.43	0.68	1.26	1.14	2.14	0.63
	0.5	1.48	1.06	0.69	0.61	0.89	0.53
	0.75	1.25	0.49	0.71	0.47	0.77	0.56
	0.41	0.38	0.57	0.94	0.39	1.55	0.47
	0.52	0.41	0.89	1.35	0.65	0.92	0.43
	0.58	0.79	0.91	1.44	0.93	0.5	0.38
	0.35	0.74	0.85	0.68	1.01	1.03	1.76
	0.28	0.58	0.51	0.9	0.68	1.62	1.04
	1.24	0.29	0.49	1	0.79	1.46	1.35
	0.6	0.61	0.95	0.57	0.74	1.93	0.92
	0.92	0.6	0.73	0.93	0.45	0.78	0.95
	1.05	1.82	0.57	0.67	1.01	2.01	0.73
	1.55	2.25	0.89	1.49	1.01	1.79	1.5
	0.73	1.43	0.85	0.81	1.01	0.49	0.55
	0.36	0.85	1.03	0.84	0.64	2.89	0.72
	1.16	0.73	0.54	1.33	0.47	0.56	0.91
	0.78	0.55	0.3	0.98	0.77	0.53	0.7
	0.62	0.8	0.93	1.32	1.34	0.4	0.32
	0.41	0.72	0.69	1.32	0.98	2.33	0.96
	0.54	0.29	0.43	0.34	1.05	0.49	0.62
	0.42	0.33	0.71	1.03	1.61	1.37	1.75
	0.57	1.11	0.44	0.91	0.93	0.98	1.06
	0.39	0.97	0.28	0.65	1.04	1.05	0.76
	0.35	0.77	0.64	0.21	0.59	0.56	0.75
	0.21	0.6	0.8	1.31	1.06	1.46	1.1
	0.54	1.1	0.25	0.58	0.37	1.72	0.51
	0.25	0.86	0.47	0.68	0.44	1.8	0.75
	0.48	0.92	0.51	0.46	1.49	1.73	2.21
	0.75	0.45	0.62	1	0.7	1.36	0.51
	0.61	0.45	0.6	0.34	1.35	0.86	0.54
	1.13	0.77	1.62	2.13	0.56	1.57	0.7
	1.35	0.69	0.51	0.96	0.77	0.76	0.67
	1.46	0.91	0.26	0.58	0.76	0.89	1.04
	0.7	0.81	0.43	0.95	0.79	1.08	0.46
	0.69	0.3	0.66	0.76	0.5	1.08	0.58
	0.69	0.46	0.45	0.51	0.52	1.08	0.63
	1.21	0.44	1.21	1.01	0.74	1.81	0.66
	0.56	1.12	0.39	1.37	1.29	1.13	1.79
	0.84	0.36	0.6	1.94	1.4	2.14	0.49
	1.36	0.95	1.25	1.05	0.58	0.79	0.71
	0.56	1.01	1.05	0.77	0.76	1.73	0.52
	0.82	0.75	0.51	1.06	1.56	1.41	1.24
	0.45	0.6	0.86	0.48	2.1	1.81	1.45
	0.61	0.36	0.75	1.75	0.59	1.77	0.57
	0.41	0.35	1.22	0.51	1.2	0.74	0.54
	0.29	1.47	0.37	0.4	0.57	0.64	0.59
	0.32	0.56	0.24	1.29	0.59	0.87	1.2
	1.04	0.45	0.45	0.34	1.29	1.86	0.86
	1.04	0.49	1.76	0.6	0.43	1.29	0.68
	0.21	0.3	0.28	0.51	0.28	1.04	0.97
	0.61	0.22	0.44	1.43	0.83	1.34	1.19
	0.35	0.37	0.51	0.59	1.19	0.95	1.23
	0.74	1.11	0.79	1.24	0.49	1.85	1.34
	0.54	1.18	0.27	0.52	1.01	1.38	1.17
	0.29	0.69	0.27	0.45	0.88	1.73	2.12
	0.96	0.21	0.91	0.42	0.96	1.05	0.71
	0.87	0.47	0.24	1.48	0.74	1.94	0.73
	0.26	1.17	0.25	0.36	0.52	1.56	0.76
	0.82	0.61	0.43	0.32	0.47	1.7	0.66
	0.39	0.53	0.69	1.21	0.39	1.42	1.09
	0.96	0.35	0.43	1.04	0.73	1.45	0.94
	0.33	1.44	0.35	0.66	1.13	1.78	1.04
	0.41	0.5	0.51	0.88	0.63	0.88	0.68
	0.33	0.48	0.44	1.5	1.67	0.91	0.38
	0.25	1.48	0.93	0.83	1.33	0.66	1.05
	1.18	1.99	0.31	1.49	1.42	1.93	0.9
	0.51	2.95	0.34	0.7	0.67	0.81	1.33
	0.79	1.91	0.69	0.38	1	1.49	0.72
	0.35	0.35	0.31	0.78	0.66	1.65	1.31
	0.46	1.16	0.35	2.79	0.5	0.81	1.26
	0.33	1.16	0.47	0.91	1.16	1.62	0.68
	1.22	0.38	0.34	0.56	0.74	2.16	1.16
	0.89	0.93	0.86	0.95	0.5	0.42	1.41
	0.44	0.82	1.07	0.7	1.37	1.6	0.99
	0.58	0.42	0.78	0.87	1.72	2.49	0.51
	1.29	1.22	0.73	0.97	0.8	1.51	0.4
	0.29	1.17	1.09	1.63	0.44	1.28	1.09
	0.87	0.72	0.42	2.1	0.89	1.72	0.6
	0.33	1.28	0.42	0.9	1.52	2.2	0.62
	0.63	0.94	0.55	0.37	1.4	1.08	0.96
	0.21	0.66	0.65	1.1	0.4	0.38	0.55
	1.38	0.68	0.38	1.12	0.52	0.32	0.75
	0.76	0.38	0.34	1.41	0.89	0.28	1.73
	0.36	1.52	1.51	0.97	0.91	1.65	0.59
	0.48	1.36	0.77	0.63	1.38	1.82	0.36
	0.4	1.01	0.72	0.53	1.54	0.5	1.08
	0.7	0.32	0.45	0.68	0.79	0.58	0.77
	0.74	0.24	0.43	1.38	0.67	1.22	0.58
	0.5	0.26	0.53	4.16	0.73	1.17	1.76
	0.46	0.9	1.11	1.51	0.71	1.7	0.75
	0.54	0.74	0.47	1.21	0.66	1.41	1.84
	0.4	0.2	0.62	0.62	0.83	0.85	0.69
	0.26	1.45	1.05	1.4	1.03	0.75	0.71
	0.29	1.34	0.67	0.76	0.67	1.47	1.67
	0.23	1.53	0.63	0.34	0.71	1.13	0.63
	0.4	0.8	0.97	0.44	0.4	1.47	1.25
	0.37	0.37	1.01	0.39	1.19	0.65	1.37
	0.65	0.3	0.67	0.84	0.69	1.14	0.79
	0.77	1.5	0.63	0.56	0.64	1.29	1.39
	0.98	0.93	0.27	0.95	0.47	0.94	0.63
	0.63	0.46	0.27	1.05	1.13	1.18	1.03
	0.23	0.51	0.31	1.04	1.15	0.65	1.1
	0.42	0.44	0.35	0.69	0.31	0.54	1.14
	1	1.09	0.29	1.19	0.9	0.86	1.09
	0.3	0.3	0.92	0.54	0.73	1.06	2.3
	0.33	0.62	0.38	1.18	0.6	1.93	0.84
	0.58	0.23	0.73	1.02	0.38	1.38	0.8
	0.25	0.39	0.89	0.98	0.88	1.34	0.78
	0.28	1.4	0.58	0.53	1.1	1.42	1.72
	0.26	0.56	0.31	0.7	1.09	1.63	1.6
	0.3	0.32	1.07	0.64	0.89	0.71	1.03
	0.54	0.6	0.59	0.59	1.04	1.85	1.23
	0.86	1.13	0.3	0.76	0.75	1.28	0.86
	0.41	0.47	0.36	0.6	0.67	1.48	0.9
	0.22	0.8	0.55	0.4	1.07	1.28	0.49
	0.43	0.61	0.62	0.8	0.64	1.05	0.75
	0.32	1.54	0.51	0.91	1.39	1.59	0.85
	0.21	0.66	0.85	0.99	0.86	0.91	0.7
	0.41	0.56	1.12	0.53	0.6	2.8	0.7
	0.6	0.62	1.01	0.35	0.63	1.19	0.52
	1.18	1.31	0.68	0.62	0.52	1.58	1.15
	1.14	0.84	1.19	1.1	0.45	1.16	1.19
	0.53	0.67	0.36	1.35	0.46	1.46	0.9
	0.26	0.68	1.23	0.45	0.54	1.05	1.3
	0.68	0.76	0.36	0.6	1.22	1.99	0.97
	0.29	1.35	0.64	1.61	0.74	1.63	1.19
	0.24	0.59	0.49	0.84	0.75	2.52	0.72
	0.81	1.03	0.46	0.33	0.62	1.39	1.25
	0.29	0.48	0.5	0.87	0.78	1.19	0.83
	0.87	0.32	0.53	1.07	0.97	0.71	0.68
	0.75	0.23	0.44	0.51	1.29	1.74	0.5
	0.8	0.24	0.47	0.41	1.22	1.21	1.57
	0.34	0.54	0.61	0.97	0.86	1.3	0.71
	0.42	1.09	1.61	0.81	0.79	1.94	0.49
	0.32	0.41	0.67	0.93	1.25	1.46	0.71
	1.13	1.2	0.47	1.12	0.67	1.53	0.62
	0.65	1.37	0.32	0.66	0.48	0.5	0.56
	0.33	0.23	0.33	0.77	1.33	0.59	0.9
	1.32	0.66	0.8	0.81	0.57	0.85	0.87
	0.78	0.62	0.94	1.48	0.94	1.56	1.25
	1.01	0.58	0.49	1.42	0.54	0.98	0.82
	0.58	0.88	0.63	1.43	1.37	1.78	0.48
	0.49	1.32	0.5	0.48	0.71	1.15	0.48
	0.31	1.15	0.36	0.61	1.31	1.41	0.6
	0.73	1.04	0.62	0.63	0.98	0.95	0.68
	1.04	1.06	0.65	0.95	0.93	1.1	0.49
	1.29	0.25	0.49	0.63	0.77	1.9	0.66
	0.26	1.46	0.33	0.47	1.01	0.97	0.8
	0.51	0.45	0.95	0.42	1.71	0.64	1.44
	0.7	2.03	2.12	0.98	0.99	0.51	0.79
	0.41	0.87	0.41	0.5	2.01	1.73	1.61
	1.02	0.62	0.78	0.85	1.03	1.44	1.16
	0.9	2.1	0.48	1.37	1.59	0.82	1.07
	0.31	0.4	1.34	0.58	0.59	0.4	0.58
	0.78	1.43	0.88	1.01	1.12	1.03	1.46
	0.54	1.26	0.64	1.41	0.36	1.47	0.84
	0.3	0.43	0.6	0.64	1	1.35	0.83
	0.58	0.49	0.63	0.52	0.76	3.6	1
	0.67	0.83	0.99	0.64	0.95	1.65	0.92
	0.46	1.16	0.73	0.67	0.81	1.07	0.93
	0.78	0.82	0.65	1.17	0.75	1.3	0.66
	0.73	0.49	0.52	0.55	0.68	1.41	1.64
	0.72	0.37	1.25	0.72	0.51	0.8	1.62
	0.24	0.54	0.54	0.48	1.55	2.44	1.19
	0.2	0.67	0.2	0.53	1.6	1.12	1.1
	0.3	0.66	0.27	0.91	2.14	1.09	0.77
	0.86	0.77	0.34	0.56	1.14	1.93	0.51
	0.61	0.85	0.49	0.81	0.8	0.76	0.51
	0.28	0.43	0.55	0.84	0.97	1.09	1.82
	0.26	1.64	0.31	0.73	0.54	1.49	0.94
	0.27	0.96	0.77	0.36	0.58	1.06	0.69
	0.6	0.68	0.56	0.59	1.91	1.49	1.16
	0.32	0.55	0.49	0.9	0.84	1.71	0.99
	0.29	1.16	1.43	0.62	1.24	1.62	0.84
	0.36	0.43	0.55	1.32	1.48	1.4	0.95
	0.75	0.92	0.52	0.6	0.68	2.54	1.83
	0.45	1.11	0.27	0.78	0.76	1.32	1.18
	0.63	0.61	0.29	0.62	0.66	0.66	1.31
	0.23	0.59	1.23	0.88	1.28	1.28	1.23
	0.69	0.65	0.46	0.73	1.3	1.29	1.28
	0.45	0.22	0.6	0.31	1.64	1.64	1.29
	0.81	0.91	0.7	0.63	1.25	1.58	0.55
	0.89	0.54	0.85	0.77	0.47	0.67	0.69
	0.29	0.52	0.45	0.49	1.06	1.01	1.01
	0.34	0.73	0.43	0.62	0.81	1.39	0.71
	0.24	0.4	0.43	0.81	0.73	0.68	0.66
	0.31	0.89	1.13	0.57	0.82	0.68	0.44
	0.98	0.74	0.62	1.1	0.77	0.35	0.79
	1.38	1.27	0.35	0.53	0.6	0.73	0.83
	0.92	1.44	0.86	1.01	0.85	1.81	0.64
	1.12	0.25	0.36	0.7	0.69	2.12	1.35
	0.87	0.44	0.36	0.83	0.88	0.82	1.41
	1.41	0.79	0.92	0.59	0.63	0.77	1.4
	0.65	1.32	0.48	0.97	0.57	1.86	0.65
	0.43	0.56	0.54	1.05	0.7	1.45	1.07
	0.67	0.45	0.29	0.59	0.52	1.64	1.84
	0.45	0.29	0.56	0.41	0.85	1.46	0.7
	0.31	0.41	0.45	1.26	1.43	0.61	0.78
	0.55	0.55	0.47	1.25	1.79	1.52	0.42
	0.59	1.03	0.39	1.7	1.34	0.75	0.8
	0.83	0.8	0.44	1.71	0.68	1.37	1.23
	0.49	1.22	0.57	1.19	0.33	0.85	0.92
	0.54	0.72	0.44	0.7	1.76	0.61	1.92
	0.37	0.7	0.84	1.48	0.7	1.22	2.16
	0.3	0.65	0.52	0.71	0.75	1.09	0.74
	0.59	0.32	0.76	0.96	2.09	0.92	0.99
	0.49	0.78	0.69	0.8	0.71	1.3	0.79
	0.54	1.61	0.56	0.87	0.89	1.93	0.68
	0.44	0.73	0.31	0.58	0.57	1.97	1.9
	0.5	0.57	0.62	1.42	2.12	1.31	1.03
	0.87	0.51	0.84	0.79	1.43	0.75	0.89
	0.43	0.31	0.73	1.16	1.12	1.24	1.02
	1.18	0.19	0.43	0.54	1.72	1.55	0.93
	0.6	0.53	0.27	0.67	0.51	1.06	0.86
	0.43	1.2	0.23	0.81	1.36	1.09	0.68
	0.24	0.32	0.53	0.55	0.73	1.3	0.78
	0.37	0.79	0.46	0.67	0.73	2.05	3.12
	0.94	0.26	0.5	0.58	0.65	1.69	0.89
	0.65	0.33	0.44	1.22	0.9	1.44	0.5
	0.56	0.47	0.46	0.28	0.34	0.83	1.1
	0.32	1.09	1.09	0.78	0.76	2.36	0.89
	0.28	0.4	0.48	0.59	0.86	1.48	1.51
	0.59	0.24	0.47	1.3	0.56	0.58	0.58
	0.49	0.45	1.14	0.86	0.89	1.45	0.56
	0.97	1.21	0.58	0.36	0.75	2.22	0.63
	0.74	0.33	0.45	0.93	1.56	1.29	0.61
	0.88	0.94	0.33	1.33	0.92	0.93	0.48
	0.92	0.7	0.44	0.42	0.84	0.64	0.59
	0.21	0.36	0.64	1.13	0.51	1.14	0.7
	0.35	0.39	0.58	0.75	0.98	1.27	0.55
	0.84	1.48	0.45	0.59	0.65	1.51	0.76
	1.32	1.26	0.57	0.71	0.55	1.43	0.5
	0.96	1.31	0.43	0.84	1.71	1.21	0.77
	0.48	0.81	0.6	0.8	1.34	0.66	1.04
	0.47	0.82	1.13	0.62	0.85	0.71	1.79
	0.33	0.42	0.42	0.49	0.93	1.31	0.71
	0.25	0.3	0.36	1.06	0.71	0.97	0.98
	0.43	0.96	0.44	0.67	0.8	1.47	0.59
	1.32	0.64	0.77	1.7	0.97	0.95	0.56
	0.52	1.06	0.93	0.91	0.54	1.56	0.41
	1.53	0.45	0.8	0.75	0.68	2	1.13
	0.35	0.25	0.8	1.68	0.63	1.38	0.35
	0.61	0.7	0.59	0.75	1.21	0.77	0.51
	0.53	0.73	0.35	1.25	0.77	1.47	1.32
	0.24	0.66	0.31	0.88	1.37	1.33	0.47
	0.38	0.54	0.97	1.75	1.06	1.69	0.73
	0.34	0.23	0.65	0.77	1.48	1.45	1.19
	1.21	0.63	0.52	0.47	1.53	1.43	0.71
	0.59	0.73	0.39	0.79	0.88	1.7	2.69
	0.92	1.01	0.28	0.81	0.61	1.4	2.05
	0.5	0.41	0.59	0.62	0.82	0.69	0.61
	1.13	0.74	0.9	0.98	0.65	1.5	0.88
	1.11	0.3	0.93	0.87	1.02	1.72	0.57
	0.48	0.76	0.59	1.01	0.5	1.62	1.03
	0.93	0.3	0.65	0.58	0.83	1.9	1.12
	0.42	0.43	1.17	0.78	0.43	0.75	2.22
	0.34	0.61	0.77	1.68	0.91	2.2	0.34
	0.8	0.78	0.53	0.68	0.67	0.48	0.55
	0.3	1.29	0.27	1.11	1.23	1.94	0.69
	0.35	1.19	0.52	0.87	0.48	1.44	0.64
Means (µm²)	0.612543	0.768143	0.624629	0.865486	0.917229	1.28414	0.938857
SD	0.324987	0.424484	0.296837	0.41995	0.381607	0.539041	0.432496

## Sheet: Statistical tables
	Descriptive Statistics (Maximal projection area)
			varicosity N	MEAN µm²	SD
		PL (L1)	350	0.61	0.32
		PL (L3)	350	0.77	0.42
		PL (L5)	350	0.62	0.30
		A1 (L1)	350	0.86	0.42
		A1 (L3)	350	0.92	0.38
		A1(L4)	350	1.28	0.54
		A1 (L5)	350	0.94	0.43
					p-values ANOVA (Dunnett's Correction)
	PL (L1)	PL (L3)	PL (L5)	A1 (L1)	A1 (L3)	A1 (L4)	A1 (L5)
PL (L1)		˂ 0.001	1.0	˂ 0.001	˂ 0.001	˂ 0.001	˂ 0.001
PL (L3)	˂ 0.001		˂ 0.001	0.049	˂ 0.001	˂ 0.001	˂ 0.001
PL (L5)	1.0	˂ 0.001		˂ 0.001	˂ 0.001	˂ 0.001	˂ 0.001
A1 (L1)	˂ 0.001	0.049	˂ 0.001		0.854	˂ 0.001	0.386
A1 (L3)	˂ 0.001	˂ 0.001	˂ 0.001	0.854		˂ 0.001	1.0
A1 (L4)	˂ 0.001	˂ 0.001	˂ 0.001	˂ 0.001	˂ 0.001		˂ 0.001
A1 (L5)	˂ 0.001	˂ 0.001	˂ 0.001	0.386	1.0	˂ 0.001
					p-values Kolmogorov - Smirnov Test
	PL (L1)	PL (L3)	PL (L5)	A1 (L1)	A1 (L3)	A1 (L4)	A1 (L5)
PL (L1)		0.001	0.026	0.001	0.001	0.001	0.001
PL (L3)	0.001		0.001	0.001	0.001	0.001	0.001
PL (L5)	0.026	0.001		0.001	0.001	0.001	0.001
A1 (L1)	0.001	0.001	0.001		0.074	0.001	0.213
A1 (L3)	0.001	0.001	0.001	0.074		0.001	0.969
A1 (L4)	0.001	0.001	0.001	0.001	0.001		0.001
A1 (L5)	0.001	0.001	0.001	0.213	0.969	0.001
