# Supplementary material for: Variation of connectivity across exemplar sensory and associative thalamocortical loops in the mouse
Source: eLife. 2020 Oct 26;9:e62554. doi: 10.7554/eLife.62554 (PMC7644223; doi:10.7554/eLife.62554)
Supplement: Figure 2—source data 2. [file elife-62554-fig2-data2.xlsx]

## Sheet: Sheet1
											p-values of Kolmogorov - Smirnov Test comparing distribution of thalamocortical bouton sizes across layers in PL and A1
									PL (L1)	PL (L3)	PL (L5)	A1 (L1)	A1 (L3)	A1 (L4)	A1 (L5)
								PL (L1)		0.001	0.026	0.001	0.001	0.001	0.001
								PL (L3)	0.001		0.001	0.001	0.001	0.001	0.001
								PL (L5)	0.026	0.001		0.001	0.001	0.001	0.001
								A1 (L1)	0.001	0.001	0.001		0.074	0.001	0.213
								A1 (L3)	0.001	0.001	0.001	0.074		0.001	0.969
								A1 (L4)	0.001	0.001	0.001	0.001	0.001		0.001
								A1 (L5)	0.001	0.001	0.001	0.213	0.969	0.001
													p-values of Dunn’s corrected multiple comparisons post Kruskal Wallis test comparing pooled thalamocortical bouton sizes across layers in PL and A1
									PL (L1)	PL (L3)	PL (L5)	A1 (L1)	A1 (L3)	A1 (L4)	A1 (L5)
								PL (L1)		<0.0001	>0.9999	<0.0001	<0.0001	<0.0001	<0.0001
								PL (L3)	<0.0001		<0.0001	0.0055	<0.0001	<0.0001	<0.0001
								PL (L5)	>0.9999	<0.0001		<0.0001	<0.0001	<0.0001	<0.0001
								A1 (L1)	<0.0001	0.0055	<0.0001		0.9401	<0.0001	0.7175
								A1 (L3)	<0.0001	<0.0001	<0.0001	0.9401		<0.0001	>0.9999
								A1 (L4)	<0.0001	<0.0001	<0.0001	<0.0001	<0.0001		<0.0001
								A1 (L5)	<0.0001	<0.0001	<0.0001	0.7175	>0.9999	<0.0001
