# Supplementary material for: Variation of connectivity across exemplar sensory and associative thalamocortical loops in the mouse
Source: eLife. 2020 Oct 26;9:e62554. doi: 10.7554/eLife.62554 (PMC7644223; doi:10.7554/eLife.62554)
Supplement: Figure 3—figure supplement 2—source data 1. [file elife-62554-fig3-figsupp2-data1.xlsx]

## Sheet: SuppFig2
	Supplemental figure 2--source data
	Quantification of Outputs to PL vs A1
		MD-->PL					MGB-->A1
Section	Animal ID	#mCh cells in PL	#PV cells in PL		Section	Animal ID	#mCh cells in A1	#PV cells in A1
1	M1_sec1	62	67		1	M1_sec1	49	43
2	M1_sec2	117	79		2	M1_sec2	74	36
3	M2_sec3	32	72		3	M2_sec3	16	67
4	M2_sec4	36	62		4	M2_sec4	28	66
5	M3_sec5	19	79		5	M2_sec5	36	76
6	M3_sec6	24	75		6	M2_sec6	13	35
7	M3_sec7	28	58		7	M2_sec7	45	81
8	M4_sec8	44	64		8	M2_sec8	12	56
9	M4_sec9	53	79		9	M2_sec9	148	164
10	M4_sec10	36	81		10	M2_sec10	216	220
