# Supplementary material for: Variation of connectivity across exemplar sensory and associative thalamocortical loops in the mouse
Source: eLife. 2020 Oct 26;9:e62554. doi: 10.7554/eLife.62554 (PMC7644223; doi:10.7554/eLife.62554)
Supplement: Figure 3—source data 1. [file elife-62554-fig3-data1.xlsx]

## Sheet: RAW DATA - Laminar Distribution
							Laminar Distribution of anterogradely labelled cells (Figure 3E)
		MD-->PL (Cell Counts)													MGB-->A1 (Cell Counts)
Distance From Pia (µm)	M1_sec1	M1_sec2	M2_sec3	M2_sec4	M3_sec5	M3_sec6	M3_sec7	M4_sec8	M4_sec9	M4_sec10		Distance From Pia (µm)	M1_sec1	M1_sec2	M2_sec3	M2_sec4	M2_sec5	M3_sec6	M3_sec7	M3_sec8	M4_sec9	M4_sec10
0-50	0	0	0	0	0	0	1	1	0	0		0-50	0	0	0	0	1	0	0	0	2	5
50-100	0	0	1	0	0	0	0	1	2	1		50-100	0	0	0	0	0	0	1	0	0	6
100-150	0	0	1	0	0	0	1	1	2	0		100-150	0	1	0	0	0	0	0	0	1	6
150-200	1	1	2	1	1	0	1	1	3	2		150-200	0	2	0	0	0	0	1	0	1	5
200-250	3	6	3	3	0	0	2	2	5	4		200-250	0	4	0	1	0	0	1	0	2	5
250-300	6	12	4	3	0	0	3	5	5	5		250-300	0	6	0	1	1	0	2	0	4	6
300-350	7	14	3	5	0	1	2	5	5	5		300-350	1	6	0	1	1	0	1	0	5	10
350-400	6	10	3	4	1	1	1	5	5	3		350-400	3	6	0	1	1	0	3	1	6	10
400-450	5	8	3	4	1	1	1	3	5	3		400-450	5	6	0	1	4	1	5	1	6	14
450-500	4	7	4	2	2	2	3	3	5	2		450-500	6	7	0	2	5	1	6	1	10	17
500-550	4	9	3	2	3	2	3	3	5	2		500-550	7	7	2	3	5	1	5	0	11	19
550-600	4	9	2	3	3	2	3	3	5	3		550-600	6	5	4	3	3	2	5	1	11	18
600-650	5	11	1	3	3	2	2	2	3	2		600-650	5	4	3	3	2	1	3	1	11	14
650-700	5	10	1	3	3	3	2	3	2	2		650-700	3	4	3	2	2	1	2	1	14	13
700-750	5	10	1	2	1	4	2	3	1	1		700-750	2	5	2	2	2	1	1	1	18	16
750-800	4	6	0	1	1	4	1	2	0	1		750-800	1	5	2	2	2	1	2	1	22	20
800-850	2	4	0	0	0	1	0	1	0	0		800-850	2	4	0	2	2	1	3	1	15	19
850-900	1	0	0	0	0	1	0	0	0	0		850-900	3	2	0	1	2	1	2	1	8	10
900-950	0	0	0	0	0	0	0	0	0	0		900-950	3	0	0	1	2	1	1	1	1	3
950-1000	0	0	0	0	0	0	0	0	0	0		950-1000	2	0	0	1	1	1	1	1	0	0
1000-1050	0	0	0	0	0	0	0	0	0	0		1000-1050	0	0	0	1	0	0	0	0	0	0
Total	62	117	32	36	19	24	28	44	53	36		Total	49	74	16	28	36	13	45	12	148	216
		MD-->PL (% of Total)												MGB-->A1 (% of Total)
Distance From Pia (µm)												Distance From Pia (µm)
0-50	0	0	0	0	0	0	3.57143	2.27273	0	0		0-50	0	0	0	0	2.77778	0	0	0	1.35135	2.31481
50-100	0	0	3.125	0	0	0	0	2.27273	3.77358	2.77778		50-100	0	0	0	0	0	0	2.22222	0	0	2.77778
100-150	0	0	3.125	0	0	0	3.57143	2.27273	3.77358	0		100-150	0	1.35135	0	0	0	0	0	0	0.675676	2.77778
150-200	1.6129	0.854701	6.25	2.77778	5.26316	0	3.57143	2.27273	5.66038	5.55556		150-200	0	2.7027	0	0	0	0	2.22222	0	0.675676	2.31481
200-250	4.83871	5.12821	9.375	8.33333	0	0	7.14286	4.54545	9.43396	11.1111		200-250	0	5.40541	0	3.57143	0	0	2.22222	0	1.35135	2.31481
250-300	9.67742	10.2564	12.5	8.33333	0	0	10.7143	11.3636	9.43396	13.8889		250-300	0	8.10811	0	3.57143	2.77778	0	4.44444	0	2.7027	2.77778
300-350	11.2903	11.9658	9.375	13.8889	0	4.16667	7.14286	11.3636	9.43396	13.8889		300-350	2.04082	8.10811	0	3.57143	2.77778	0	2.22222	0	3.37838	4.62963
350-400	9.67742	8.54701	9.375	11.1111	5.26316	4.16667	3.57143	11.3636	9.43396	8.33333		350-400	6.12245	8.10811	0	3.57143	2.77778	0	6.66667	8.33333	4.05405	4.62963
400-450	8.06452	6.83761	9.375	11.1111	5.26316	4.16667	3.57143	6.81818	9.43396	8.33333		400-450	10.2041	8.10811	0	3.57143	11.1111	7.69231	11.1111	8.33333	4.05405	6.48148
450-500	6.45161	5.98291	12.5	5.55556	10.5263	8.33333	10.7143	6.81818	9.43396	5.55556		450-500	12.2449	9.45946	0	7.14286	13.8889	7.69231	13.3333	8.33333	6.75676	7.87037
500-550	6.45161	7.69231	9.375	5.55556	15.7895	8.33333	10.7143	6.81818	9.43396	5.55556		500-550	14.2857	9.45946	12.5	10.7143	13.8889	7.69231	11.1111	0	7.43243	8.7963
550-600	6.45161	7.69231	6.25	8.33333	15.7895	8.33333	10.7143	6.81818	9.43396	8.33333		550-600	12.2449	6.75676	25	10.7143	8.33333	15.3846	11.1111	8.33333	7.43243	8.33333
600-650	8.06452	9.40171	3.125	8.33333	15.7895	8.33333	7.14286	4.54545	5.66038	5.55556		600-650	10.2041	5.40541	18.75	10.7143	5.55556	7.69231	6.66667	8.33333	7.43243	6.48148
650-700	8.06452	8.54701	3.125	8.33333	15.7895	12.5	7.14286	6.81818	3.77358	5.55556		650-700	6.12245	5.40541	18.75	7.14286	5.55556	7.69231	4.44444	8.33333	9.45946	6.01852
700-750	8.06452	8.54701	3.125	5.55556	5.26316	16.6667	7.14286	6.81818	1.88679	2.77778		700-750	4.08163	6.75676	12.5	7.14286	5.55556	7.69231	2.22222	8.33333	12.1622	7.40741
750-800	6.45161	5.12821	0	2.77778	5.26316	16.6667	3.57143	4.54545	0	2.77778		750-800	2.04082	6.75676	12.5	7.14286	5.55556	7.69231	4.44444	8.33333	14.8649	9.25926
800-850	3.22581	3.4188	0	0	0	4.16667	0	2.27273	0	0		800-850	4.08163	5.40541	0	7.14286	5.55556	7.69231	6.66667	8.33333	10.1351	8.7963
850-900	1.6129	0	0	0	0	4.16667	0	0	0	0		850-900	6.12245	2.7027	0	3.57143	5.55556	7.69231	4.44444	8.33333	5.40541	4.62963
900-950	0	0	0	0	0	0	0	0	0	0		900-950	6.12245	0	0	3.57143	5.55556	7.69231	2.22222	8.33333	0.675676	1.38889
950-1000	0	0	0	0	0	0	0	0	0	0		950-1000	4.08163	0	0	3.57143	2.77778	7.69231	2.22222	8.33333	0	0
1000-1050	0	0	0	0	0	0	0	0	0	0		1000-1050	0	0	0	3.57143	0	0	0	0	0	0

## Sheet: RAW DATA - Overlap
	Overlap of cortical PV neurons with Anterogradely labelled neurons - Figure 3G
	MD-->PL (PL)
Section ID	#mCherry+ cells	#mCherry+ and PV+ cells
M1_sec1	62	15
M1_sec2	117	18
M2_sec3	32	13
M2_sec4	36	13
M3_sec5	19	8
M3_sec6	24	6
M3_sec7	28	13
M4_sec8	44	9
M4_sec9	53	12
M4_sec10	36	7
	MGB-->A1 (A1)
Section ID	#mCherry+ cells	#mCherry+ and PV+ cells
M1_sec1	49	5
M1_sec2	74	8
M2_sec3	16	2
M2_sec4	28	13
M2_sec5	36	8
M3_sec6	13	1
M3_sec7	45	13
M3_sec8	12	3
M4_sec9	148	13
M4_sec10	216	39
