# Supplementary material for: Variation of connectivity across exemplar sensory and associative thalamocortical loops in the mouse
Source: eLife. 2020 Oct 26;9:e62554. doi: 10.7554/eLife.62554 (PMC7644223; doi:10.7554/eLife.62554)
Supplement: Figure 4—figure supplement 1—source data 1. [file elife-62554-fig4-figsupp1-data1.xlsx]

## Sheet: Sheet1
		Overlap of mGRASP Labelled synapses with vGluT1 and vGluT2
VGlut2							VGlut1
MD-->PL	VGlut2	mGrasp	Colabelled	%mGrasp Overlapped			MD-->PL	VGlut1	mGrasp	Colabelled	%mGrasp Overlapped
Mouse 1_cell 1	20	11	3	27.2727			Mouse 1_cell 1	12	7	0	0
Mouse 1_cell 2	34	13	4	30.7692			Mouse 1_cell 2	24	11	1	9.09091
Mouse 1_cell 3	16	13	2	15.3846			Mouse 1_cell 3	33	8	0	0
Mouse 1_cell 4	16	11	3	27.2727			Mouse 1_cell 4	13	8	0	0
Mouse 1_cell 5	21	6	3	50			Mouse 1_cell 5	25	13	1	7.69231
Mouse 1_cell 6	36	9	2	22.2222			Mouse 2_cell 6	21	13	1	7.69231
Mouse 2_cell 7	40	20	4	20			Mouse 2_cell 7	9	10	1	10
Mouse 2_cell 8	30	19	4	21.0526			Mouse 2_cell 8	32	17	1	5.88235
Mouse 2_cell 9	23	12	4	33.3333			Mouse 2_cell 9	21	10	0	0
Mouse 2_cell 10	26	16	4	25			Mouse 2_cell 10	13	12	0	0
			Average	27.2307						Average	4.03579
			SEM	3.03507						SEM	1.3853
												Example
MGB-->A1							MGB-->A1
Mouse 1_cell 1	16	8	4	50			Mouse 1_cell 1	23	9	0	0
Mouse 1_cell 2	14	8	1	12.5			Mouse 1_cell 2	23	4	0	0
Mouse 1_cell 3	26	2	1	50			Mouse 1_cell 3	10	3	0	0
Mouse 1_cell 4	20	9	3	33.3333			Mouse 1_cell 4	12	3	0	0
Mouse 1_cell 5	18	6	3	50			Mouse 1_cell 5	24	8	0	0
Mouse 2_cell 6	15	8	1	12.5			Mouse 2_cell 6	17	4	0	0
Mouse 2_cell 7	11	3	1	33.3333			Mouse 2_cell 7	24	5	0	0
Mouse 2_cell 8	9	4	3	75			Mouse 2_cell 8	17	7	1	14.2857
Mouse 2_cell 9	19	7	2	28.5714			Mouse 2_cell 9	22	10	1	10
Mouse 2_cell 10	25	8	3	37.5			Mouse 2_cell 10	34	7	1	14.2857
			Average	38.2738						Average	3.85714
			SEM	5.99394						SEM	1.9983
