# Supplementary material for: Variation of connectivity across exemplar sensory and associative thalamocortical loops in the mouse
Source: eLife. 2020 Oct 26;9:e62554. doi: 10.7554/eLife.62554 (PMC7644223; doi:10.7554/eLife.62554)
Supplement: Figure 4—source data 1. [file elife-62554-fig4-data1.xlsx]

## Sheet: RAW DATA - synaptic counts 
		Excitatory neurons (CamKII cre)				Thalamocortical synaptic frequency (Figure 4D)								Inhibitory neurons (PV cre)
	MD-->PL			MGB-->A1									MD-->PL			MGB-->A1
Cell ID	No. of Synapses		Cell ID	No. of Synapses								Cell ID	No. of Synapses		Cell ID	No. of Synapses
M1_sec1_cell1	12		M1_sec1_cell1	5								M1_sec1_cell1	15		M1_sec1_cell1	8
M1_sec1_cell2	9		M1_sec1_cell2	10								M1_sec1_cell2	15		M1_sec1_cell2	11
M1_sec1_cell3	18		M1_sec1_cell3	11								M1_sec2_cell3	21		M1_sec1_cell3	13
M1_sec1_cell4	10		M1_sec1_cell4	8								M1_sec2_cell4	18		M1_sec1_cell4	8
M1_sec2_cell5	11		M1_sec2_cell5	9								M1_sec2_cell5	17		M1_sec2_cell5	13
M1_sec2_cell6	15		M1_sec2_cell6	7								M1_sec3_cell6	16		M1_sec2_cell6	12
M1_sec2_cell7	10		M1_sec2_cell7	6								M1_sec4_cell7	15		M1_sec3_cell7	6
M1_sec2_cell8	10		M1_sec2_cell8	10								M1_sec4_cell8	17		M1_sec4_cell8	13
M1_sec2_cell9	9		M1_sec2_cell9	3								M1_sec4_cell9	16		M1_sec4_cell9	8
M1_sec3_cell10	12		M1_sec3_cell10	4								M2_sec1_cell10	19		M1_sec4_cell10	13
M1_sec3_cell11	15		M1_sec3_cell11	12								M2_sec2_cell11	17		M2_sec1_cell11	9
M2_sec1_cell12	13		M2_sec1_cell12	11								M2_sec2_cell12	19		M2_sec1_cell12	9
M2_sec1_cell13	9		M2_sec1_cell13	4								M2_sec2_cell13	17		M2_sec2_cell13	12
M2_sec2_cell14	18		M2_sec2_cell14	3								M2_sec3_cell14	15		M2_sec2_cell14	8
M2_sec2_cell15	10		M2_sec2_cell15	8								M2_sec3_cell15	17		M2_sec2_cell15	12
M2_sec2_cell16	11		M2_sec3_cell16	11								M2_sec4_cell16	15		M2_sec3_cell16	13
M2_sec3_cell17	11		M2_sec3_cell17	7								M2_sec4_cell17	20		M2_sec3_cell17	8
M2_sec3_cell18	12		M2_sec3_cell18	10								M2_sec5_cell18	15		M2_sec3_cell18	13
M2_sec3_cell19	9		M2_sec3_cell19	5								M2_sec5_cell19	19		M2_sec3_cell19	13
M2_sec3_cell20	15		M3_sec1_cell20	12								M3_sec1_cell20	17		M2_sec3_cell20	7
M2_sec3_cell21	17		M3_sec1_cell21	11								M3_sec1_cell21	15		M2_sec3_cell21	13
M2_sec3_cell22	10		M3_sec1_cell22	6								M3_sec1_cell22	17		M3_sec1_cell22	10
M3_sec1_cell23	16		M3_sec2_cell23	7								M3_sec1_cell23	20		M3_sec1_cell23	12
M3_sec1_cell24	10		M3_sec2_cell24	8								M3_sec2_cell24	15		M3_sec1_cell24	8
M3_sec1_cell25	16		M3_sec2_cell25	6								M3_sec3_cell25	19		M3_sec2_cell25	12
M3_sec1_cell26	9		M3_sec3_cell26	3								M3_sec3_cell26	15		M3_sec2_cell26	6
M3_sec2_cell27	18		M3_sec3_cell27	5								M3_sec4_cell27	16		M3_sec2_cell27	12
M3_sec2_cell28	12		M3_sec3_cell28	11								M3_sec4_cell28	15		M3_sec3_cell28	12
M3_sec2_cell29	10		M3_sec3_cell29	7								M3_sec4_cell29	22		M3_sec3_cell29	13
M3_sec2_cell30	9		M4_sec1_cell30	10								M3_sec4_cell30	16		M3_sec4_cell30	6
M3_sec3_cell31	11		M4_sec1_cell31	8								M4_sec1_cell31	15		M3_sec4_cell31	14
M3_sec3_cell32	9		M4_sec1_cell32	9								M4_sec1_cell32	15		M3_sec4_cell32	9
M4_sec1_cell33	12		M4_sec1_cell33	7								M4_sec1_cell33	19		M4_sec1_cell33	12
M4_sec1_cell34	9		M4_sec2_cell34	12								M4_sec2_cell34	18		M4_sec2_cell34	10
M4_sec1_cell35	14		M4_sec2_cell35	4								M4_sec3_cell35	15		M4_sec2_cell35	12
M4_sec2_cell36	15		M4_sec2_cell36	9								M4_sec3_cell36	17		M4_sec2_cell36	13
M4_sec2_cell37	15		M4_sec3_cell37	10								M4_sec3_cell37	19		M4_sec3_cell37	10
M4_sec3_cell38	10		M4_sec3_cell38	11								M4_sec4_cell38	15		M4_sec3_cell38	12
M4_sec3_cell39	9		M4_sec3_cell39	3								M4_sec4_cell39	18		M4_sec3_cell39	13
M4_sec3_cell40	13		M4_sec3_cell40	5								M4_sec4_cell40	15		M4_sec3_cell40	11
Sum	483			308									676			429
Mean	12.075			7.7									16.9			10.725
Median	11			8									17			12
SD	2.92108			2.87518									1.95854			2.37495

## Sheet: RAW DATA - synaptic volumes
Excitatory neurons (CamKII cre)				Inhibitory neurons (PV cre)			Distribution of mGRASP+ synapses by volume (Figure 4E)							Excitatory neurons (CamKII cre)									Inhibitory neurons (PV cre)
MD-->PL		MGB-->A1		MD-->PL		MGB-->A1							MD-->PL				MGB-->A1					MD-->PL				MGB-->A1
Volume (µm3)		Volume (µm3)		Volume (µm3)		Volume (µm3)						Bin width	Counts	Cumulative Frequency (%)		Bin width	Counts	Cumulative Frequency (%)			Bin width	Counts	Cumulative Frequency (%)		Bin width	Counts	Cumulative Frequency (%)
0.084565		0.103744		0.104583		0.103749						0 - 1 um	105	21.7391		0 - 1 um	70	22.7273			0 - 1 um	204	30.1775		0 - 1 um	108	25.1748
0.08662		0.15192		0.123507		0.113566						1 - 2 um	154	53.6232		1 - 2 um	98	54.5455			1 - 2 um	227	63.7574		1 - 2 um	166	63.8695
0.089367		0.154986		0.125961		0.149838						2 - 3 um	114	77.2257		2 - 3 um	42	68.1818			2 - 3 um	70	74.1124		2 - 3 um	50	75.5245
0.0921258		0.157906		0.130048		0.175788						3 - 4 um	45	86.5424		3 - 4 um	16	73.3766			3 - 4 um	70	84.4675		3 - 4 um	48	86.7133
0.0974598		0.171616		0.130357		0.185079						4 - 5 um	15	89.648		4 - 5 um	9	76.2987			4 - 5 um	48	91.568		4 - 5 um	22	91.8415
0.126678		0.191975		0.131925		0.192699						5 - 6 um	10	91.7184		5 - 6 um	10	79.5455			5 - 6 um	16	93.9349		5 - 6 um	10	94.1725
0.14545		0.19684		0.148034		0.213798						6 - 7 um	15	94.824		6 - 7 um	6	81.4935			6 - 7 um	9	95.2663		6 - 7 um	10	96.5035
0.152545		0.219656		0.153685		0.216089						7 - 8 um	20	98.9648		7 - 8 um	16	86.6883			7 - 8 um	9	96.5976		7 - 8 um	5	97.669
0.15688		0.243914		0.160385		0.235574						8 - 9 um	0	98.9648		8 - 9 um	0	86.6883			8 - 9 um	0	96.5976		8 - 9 um	0	97.669
0.1968		0.249021		0.166474		0.244749						9 - 10 um	5	100		9 - 10 um	6	88.6364			9 - 10 um	0	96.5976		9 - 10 um	5	98.8345
0.215764		0.323476		0.168067		0.248951						10 - 11 um	0	100		10 - 11 um	7	90.9091			10 - 11 um	5	97.3373		10 - 11 um	5	100
0.218344		0.32447		0.175659		0.250794						11 - 12 um	0	100		11 - 12 um	3	91.8831			11 - 12 um	5	98.0769		11 - 12 um	0	100
0.230159		0.326444		0.183547		0.254334						12 - 13 um	0	100		12 - 13 um	0	91.8831			12 - 13 um	4	98.6686		12 - 13 um	0	100
0.242356		0.3286		0.185363		0.256703						13 - 14 um	0	100		13 - 14 um	3	92.8571			13 - 14 um	4	99.2604		13 - 14 um	0	100
0.243095		0.331684		0.186793		0.257428						14 - 15 um	0	100		14 - 15 um	6	94.8052			14 - 15 um	0	99.2604		14 - 15 um	0	100
0.243536		0.35657		0.187443		0.263383						15 - 16 um	0	100		15 - 16 um	3	95.7792			15 - 16 um	0	99.2604		15 - 16 um	0	100
0.245879		0.357908		0.201431		0.295504						16 - 17 um	0	100		16 - 17 um	6	97.7273			16 - 17 um	0	99.2604		16 - 17 um	0	100
0.252335		0.359734		0.206529		0.298947						17 - 18 um	0	100		17 - 18 um	0	97.7273			17 - 18 um	0	99.2604		17 - 18 um	0	100
0.259661		0.36357		0.206955		0.314671						18 - 19 um	0	100		18 - 19 um	7	100			18 - 19 um	0	99.2604		18 - 19 um	0	100
0.272466		0.374502		0.208157		0.329661						19 - 20 um	0	100		19 - 20 um	0	100			19 - 20 um	5	100		19 - 20 um	0	100
0.27845		0.374776		0.210448		0.354877						sum	483			sum	308				sum	676			sum	429
0.2857		0.378088		0.238579		0.357031
0.288659		0.379823		0.238847		0.362479
0.289346		0.400867		0.238861		0.378506
0.2967		0.405483		0.245002		0.386426
0.314169		0.41647		0.245749		0.390211
0.31787		0.418056		0.247549		0.390583
0.32787		0.440721		0.250485		0.407207
0.33675		0.457936		0.253987		0.407683
0.35141		0.470265		0.257873		0.409385
0.357051		0.474574		0.265784		0.419774
0.358628		0.47765		0.267988		0.426745
0.36678		0.483764		0.27923		0.426784
0.38696		0.499407		0.280027		0.427891
0.40235		0.510808		0.28139		0.452098
0.40935		0.51127		0.28549		0.452357
0.412589		0.548741		0.289404		0.456406
0.415718		0.555355		0.291468		0.456808
0.42568		0.556132		0.29675		0.460383
0.43278		0.56668		0.298078		0.460793
0.437668		0.57269		0.300956		0.478992
0.439337		0.580354		0.30647		0.480832
0.439337		0.584375		0.309347		0.484578
0.440689		0.58594		0.31772		0.485684
0.442355		0.606753		0.319753		0.498387
0.4598		0.624009		0.320613		0.502403
0.462814		0.630536		0.32139		0.502954
0.46414		0.641412		0.324586		0.505858
0.467911		0.656313		0.332665		0.507035
0.475578		0.68963		0.346739		0.517865
0.479404		0.715334		0.347347		0.518752
0.47964		0.729232		0.348302		0.530783
0.479878		0.736484		0.348306		0.533794
0.487		0.737508		0.35555		0.547894
0.48967		0.741		0.358495		0.558408
0.521438		0.74734		0.358557		0.574488
0.526868		0.75717		0.36575		0.581669
0.5673		0.767794		0.369758		0.603385
0.5682		0.801224		0.369934		0.610347
0.578777		0.804529		0.370846		0.613267
0.580834		0.806152		0.374569		0.615505
0.582282		0.84266		0.375689		0.620486
0.585468		0.850745		0.380486		0.622372
0.590469		0.852762		0.380655		0.622561
0.592347		0.896321		0.38082		0.622708
0.622439		0.90423		0.384463		0.624079
0.623449		0.925632		0.412677		0.626434
0.65436		0.972346		0.421787		0.633963
0.65945		0.983078		0.422332		0.635593
0.660663		0.987702		0.422948		0.644253
0.66133		1.0006		0.426407		0.644636
0.66468		1.00983		0.42687		0.650095
0.67879		1.0347		0.433068		0.656078
0.68709		1.04258		0.434674		0.660414
0.688754		1.05885		0.435066		0.661562
0.6892		1.08836		0.435895		0.666594
0.69082		1.09726		0.437646		0.667354
0.69625		1.1048		0.440347		0.679391
0.702645		1.12736		0.440663		0.679614
0.709824		1.16057		0.441427		0.689527
0.719126		1.20099		0.442584		0.692093
0.725503		1.20161		0.454384		0.694604
0.73456		1.20454		0.456984		0.698337
0.7354		1.20607		0.458236		0.703384
0.738055		1.23558		0.458913		0.703385
0.741433		1.23579		0.459228		0.703764
0.7539		1.23724		0.459352		0.714065
0.780945		1.24572		0.459362		0.715537
0.785468		1.24647		0.462253		0.752309
0.790508		1.25421		0.463382		0.788435
0.79478		1.25458		0.467672		0.793353
0.797634		1.25479		0.467858		0.799465
0.8236		1.26878		0.467932		0.803386
0.83646		1.30678		0.478477		0.815499
0.903475		1.3086		0.479494		0.815651
0.92356		1.32371		0.482058		0.815758
0.93127		1.33119		0.482276		0.825833
0.93267		1.33119		0.483779		0.840952
0.93887		1.34257		0.495683		0.844904
0.94549		1.34647		0.497351		0.856436
0.962497		1.34767		0.501408		0.874157
0.973456		1.35904		0.505886		0.896335
0.98743		1.36799		0.510486		0.903453
0.991522		1.3775		0.520573		0.905643
0.993987		1.37998		0.520582		0.906604
1.01489		1.38563		0.523068		0.923991
1.02944		1.4107		0.525789		0.936206
1.04464		1.43389		0.52769		0.963325
1.04643		1.43389		0.527944		1.00462
1.04689		1.459		0.52985		1.02353
1.05264		1.46809		0.532195		1.02464
1.05788		1.48122		0.533693		1.02644
1.06773		1.48153		0.538753		1.02957
1.07245		1.48543		0.540159		1.03676
1.07452		1.48638		0.543253		1.04257
1.07606		1.49812		0.544227		1.0434
1.08228		1.50978		0.545743		1.04674
1.09685		1.51457		0.55339		1.05703
1.09746		1.55894		0.558306		1.05789
1.1376		1.56073		0.559496		1.06592
1.14485		1.56256		0.567552		1.06847
1.16335		1.56439		0.567563		1.08475
1.16385		1.56458		0.570978		1.09035
1.17465		1.56772		0.575328		1.09237
1.17566		1.56782		0.576318		1.10343
1.17982		1.56791		0.578863		1.11156
1.18294		1.59799		0.583767		1.11234
1.19649		1.60435		0.586799		1.12035
1.1967		1.62599		0.599383		1.12045
1.19944		1.63461		0.600293		1.13223
1.20083		1.64082		0.600497		1.20658
1.23376		1.66447		0.602285		1.20786
1.23476		1.67246		0.612058		1.20854
1.2407		1.67934		0.613569		1.20945
1.2587		1.68046		0.615795		1.22114
1.26965		1.68623		0.618087		1.22247
1.27905		1.68639		0.618835		1.22436
1.28306		1.73425		0.622468		1.23078
1.29348		1.7449		0.624834		1.23471
1.29477		1.74562		0.624955		1.23862
1.29491		1.74812		0.629485		1.2436
1.29547		1.7572		0.634688		1.25385
1.29567		1.78464		0.638704		1.25407
1.2965		1.78634		0.642068		1.26448
1.29767		1.79035		0.642682		1.26791
1.3057		1.79256		0.649285		1.26978
1.32674		1.79724		0.655099		1.27382
1.3337		1.82571		0.655427		1.28395
1.3456		1.82765		0.65789		1.28408
1.3458		1.83465		0.658374		1.29565
1.35301		1.83749		0.663307		1.30375
1.35328		1.83886		0.663955		1.305
1.356		1.85225		0.670238		1.30584
1.3573		1.85352		0.672058		1.30756
1.37055		1.87026		0.675539		1.30794
1.38665		1.88044		0.677855		1.31023
1.3873		1.89745		0.683368		1.31897
1.39567		1.89846		0.687904		1.32507
1.39587		1.90346		0.690286		1.33058
1.40536		1.90565		0.692386		1.34419
1.42448		1.94421		0.69497		1.35679
1.4397		1.9454		0.69672		1.37054
1.4567		1.94562		0.70355		1.37058
1.47237		1.94646		0.706398		1.39045
1.47428		1.94825		0.708627		1.39676
1.478		1.95677		0.71001		1.39858
1.4796		1.98342		0.722882		1.4014
1.48032		1.99003		0.724415		1.40868
1.48796		2.00422		0.725935		1.41447
1.48956		2.05537		0.745749		1.42068
1.49034		2.05596		0.746537		1.42137
1.49629		2.08346		0.748238		1.42206
1.4975		2.09259		0.756342		1.42348
1.49778		2.12351		0.757534		1.42368
1.4987		2.14678		0.760168		1.42425
1.52115		2.1678		0.767536		1.42568
1.52344		2.20347		0.768356		1.42895
1.5235		2.20694		0.768753		1.42896
1.5238		2.22485		0.780339		1.4323
1.5268		2.226		0.782525		1.43252
1.5278		2.26551		0.785337		1.44078
1.5296		2.30055		0.792195		1.45039
1.5349		2.34606		0.793867		1.45268
1.5356		2.34646		0.794035		1.45533
1.53864		2.34675		0.797002		1.46037
1.56037		2.34799		0.797827		1.4633
1.56378		2.36758		0.81094		1.46441
1.5672		2.38274		0.825731		1.46708
1.57948		2.46438		0.831123		1.47703
1.58967		2.48553		0.839363		1.47781
1.59085		2.51012		0.854368		1.48656
1.59346		2.51457		0.855762		1.49151
1.59635		2.5358		0.860579		1.50679
1.597		2.54389		0.863447		1.50796
1.59953		2.57549		0.870445		1.52506
1.59953		2.62359		0.882353		1.53698
1.5996		2.64739		0.901153		1.54078
1.5996		2.69336		0.913095		1.5479
1.60001		2.69402		0.921175		1.55221
1.63489		2.77146		0.92904		1.55923
1.64097		2.80355		0.948703		1.56039
1.64097		2.80456		0.956468		1.56057
1.65365		2.83978		0.956895		1.56603
1.65698		2.85637		0.994877		1.5678
1.67423		2.85799		1.02447		1.56796
1.67423		2.92355		1.02457		1.57876
1.6834		2.95689		1.02559		1.57974
1.68733		2.95999		1.03037		1.59229
1.6892		2.97747		1.03689		1.60084
1.7234		2.98457		1.04877		1.60194
1.72509		3.0246		1.05347		1.60243
1.7257		3.04786		1.05355		1.60836
1.73243		3.09738		1.05369		1.60934
1.73585		3.09946		1.05385		1.61347
1.73606		3.12086		1.05487		1.62091
1.73697		3.24701		1.06806		1.62314
1.75428		3.27953		1.07485		1.62341
1.756		3.36797		1.07848		1.62737
1.7584		3.51503		1.08344		1.6303
1.7594		3.55702		1.0879		1.63057
1.7696		3.59752		1.09446		1.63057
1.77815		3.59778		1.10447		1.6337
1.79345		3.64701		1.10586		1.63459
1.79577		3.80457		1.10654		1.63569
1.79756		3.82356		1.10857		1.64425
1.81304		3.97658		1.11456		1.64678
1.82345		4.04697		1.11691		1.65034
1.82569		4.23804		1.11747		1.6523
1.8259		4.44239		1.12243		1.65321
1.82633		4.45347		1.12956		1.67034
1.8287		4.53249		1.13397		1.6732
1.82957		4.66397		1.13955		1.67341
1.83466		4.89267		1.14474		1.68252
1.83467		4.95614		1.14575		1.69348
1.83468		4.96569		1.14648		1.69558
1.83679		5.07135		1.148		1.70129
1.8368		5.08942		1.16348		1.70298
1.8368		5.12447		1.19035		1.70386
1.839		5.16701		1.19384		1.70559
1.84368		5.20765		1.19782		1.71115
1.847		5.22736		1.20457		1.71703
1.85004		5.39716		1.20545		1.72736
1.85569		5.48247		1.20584		1.72809
1.8579		5.81346		1.20853		1.73568
1.87625		5.87358		1.20877		1.74475
1.8934		6.0541		1.21006		1.74595
1.90185		6.13086		1.21216		1.7491
1.9074		6.32227		1.21431		1.75223
1.92453		6.47432		1.21788		1.78934
1.92456		6.7013		1.22344		1.80026
1.92578		6.94664		1.22399		1.80234
1.9357		7.01233		1.22546		1.80336
1.94687		7.02783		1.22627		1.80349
1.9567		7.05582		1.22751		1.8039
1.95674		7.07836		1.23067		1.82457
1.95786		7.08996		1.23506		1.83057
1.95874		7.13461		1.23675		1.83465
1.96379		7.13468		1.24046		1.83685
1.97737		7.16701		1.24356		1.84605
2.01186		7.19534		1.24512		1.85354
2.0413		7.19578		1.24657		1.85631
2.05337		7.21431		1.24657		1.85657
2.05359		7.24634		1.24663		1.86976
2.06579		7.36286		1.24749		1.87334
2.07548		7.37946		1.25358		1.89046
2.08108		7.63504		1.25405		1.89238
2.08569		7.90237		1.2549		1.92443
2.08753		9.03489		1.25788		1.92454
2.09747		9.13679		1.26381		1.933
2.13243		9.48864		1.27337		1.93465
2.13589		9.69483		1.28046		1.93568
2.14788		9.86535		1.28403		1.93655
2.16879		9.92206		1.28958		1.98862
2.16987		10.1556		1.29045		1.99489
2.17896		10.167		1.29046		2.00252
2.18747		10.2042		1.29375		2.00768
2.18964		10.3576		1.29746		2.06693
2.19864		10.4569		1.29975		2.09348
2.22258		10.457		1.30152		2.10493
2.23357		10.8089		1.30409		2.10833
2.23479		11.2465		1.30565		2.11437
2.23959		11.5698		1.30657		2.12244
2.24368		11.6905		1.30767		2.14214
2.25203		13.3935		1.30867		2.15009
2.26389		13.557		1.31126		2.16024
2.275		13.9221		1.31795		2.18971
2.29436		14.2465		1.32568		2.21246
2.2975		14.2546		1.32949		2.21987
2.30458		14.5868		1.33648		2.22265
2.30681		14.6709		1.34269		2.23075
2.32344		14.9236		1.34578		2.24637
2.3245		14.9837		1.34587		2.25868
2.32892		15.0935		1.34649		2.32068
2.32893		15.2143		1.34691		2.36047
2.33375		15.789		1.34725		2.37306
2.34367		16.0386		1.35572		2.42057
2.34544		16.2042		1.35828		2.44603
2.34564		16.7056		1.35976		2.47803
2.34679		16.8904		1.36485		2.47929
2.35423		16.9628		1.36679		2.51056
2.3569		16.9635		1.37367		2.52507
2.35698		18.2259		1.3967		2.53225
2.35789		18.2259		1.39993		2.54213
2.39467		18.2487		1.40036		2.57469
2.40228		18.3464		1.40237		2.58306
2.40786		18.3474		1.40966		2.58625
2.4258		18.349		1.42089		2.61068
2.4347		18.4604		1.42656		2.62056
2.43547				1.42806		2.65203
2.43931				1.42841		2.65597
2.45679				1.42846		2.67024
2.45687				1.42856		2.68804
2.46096				1.43481		2.72556
2.46589				1.43562		2.73924
2.46754				1.43855		2.74823
2.46798				1.439		2.75198
2.53237				1.45257		2.76039
2.53457				1.45357		2.80129
2.5347				1.45358		2.83433
2.5368				1.45549		2.83567
2.54478				1.45782		2.86605
2.56797				1.46046		2.89717
2.5685				1.46379		2.96518
2.5698				1.46558		2.97255
2.57548				1.46589		3.00497
2.57856				1.4668		3.0467
2.579				1.47404		3.06331
2.58064				1.49737		3.09239
2.58287				1.50229		3.09454
2.58629				1.50346		3.27307
2.5889				1.50676		3.31049
2.62469				1.51045		3.32965
2.63489				1.51798		3.3368
2.6359				1.52075		3.40587
2.64378				1.52328		3.42479
2.6439				1.52958		3.42903
2.65358				1.53057		3.46066
2.65568				1.53235		3.47078
2.6769				1.53279		3.47086
2.67946				1.53669		3.4755
2.68418				1.53755		3.4775
2.6868				1.5448		3.50788
2.69524				1.54834		3.50936
2.6973				1.55396		3.52571
2.73087				1.55831		3.54709
2.7549				1.56338		3.55807
2.76589				1.56863		3.56089
2.7685				1.57544		3.56224
2.82882				1.57869		3.56459
2.83645				1.57897		3.56703
2.8368				1.58003		3.57088
2.83977				1.59024		3.59025
2.86367				1.6076		3.60784
2.86425				1.60835		3.60975
2.8643				1.61559		3.62206
2.86477				1.62102		3.62567
2.86754				1.62364		3.67068
2.868				1.63276		3.6709
2.8759				1.63498		3.68806
2.8764				1.63679		3.70894
2.8789				1.63846		3.72507
2.89234				1.63946		3.72945
2.8954				1.64002		3.73068
2.89778				1.65945		3.74083
2.9357				1.66503		3.76035
2.9358				1.67389		3.77046
2.94654				1.67468		3.83306
2.96876				1.67565		3.84482
2.97447				1.68649		3.84598
2.97578				1.68785		3.86058
2.9765				1.68976		3.92307
2.97685				1.69348		3.93585
2.98181				1.70453		4.14357
3.03909				1.72439		4.18617
3.04589				1.7246		4.21461
3.0488				1.72548		4.24069
3.05784				1.73021		4.38519
3.06344				1.7343		4.41385
3.10227				1.73877		4.47788
3.12458				1.73957		4.49786
3.12568				1.74003		4.52068
3.12579				1.74098		4.52793
3.13268				1.74347		4.56235
3.13469				1.74557		4.56355
3.13579				1.74564		4.57424
3.13804				1.74574		4.66243
3.18456				1.74584		4.67425
3.1964				1.75469		4.67957
3.21478				1.76023		4.70568
3.21679				1.76941		4.71933
3.22579				1.77464		4.79043
3.24685				1.78694		4.85656
3.24689				1.78906		4.87309
3.25809				1.79318		4.89455
3.34536				1.80373		5.02385
3.40456				1.80664		5.02396
3.45479				1.81425		5.02458
3.45673				1.82385		5.07932
3.4673				1.82459		5.1256
3.53468				1.82996		5.1475
3.57649				1.83368		5.27609
3.58652				1.8367		5.48023
3.61457				1.83706		5.56403
3.6448				1.84058		5.70485
3.68579				1.84678		6.00457
3.76648				1.85349		6.32036
3.78458				1.85734		6.42589
3.79346				1.86364		6.52457
3.8456				1.86522		6.66231
3.86575				1.87457		6.72555
3.8736				1.87579		6.79743
3.95632				1.88467		6.90238
3.95926				1.88544		6.93728
3.9664				1.89044		6.99785
3.96785				1.89575		7.05295
3.96797				1.89757		7.11438
3.9764				1.90357		7.21487
3.97887				1.90663		7.64029
4.0468				1.92205		7.90235
4.12348				1.92438		9.02458
4.13568				1.9257		9.22067
4.2468				1.92655		9.42357
4.28977				1.93365		9.53452
4.32501				1.95477		9.61295
4.36728				1.96346		10.3094
4.40144				1.96753		10.4583
4.5678				1.96854		10.6574
4.6469				1.97934		10.6705
4.75836				1.98557		10.8241
4.83309				1.99546
4.85539				1.99832
4.86583				2.00236
4.86786				2.04583
5.04647				2.05297
5.09357				2.11457
5.19668				2.14264
5.24579				2.17846
5.25728				2.24559
5.5976				2.25078
5.64379				2.31789
5.77549				2.33136
5.83566				2.33443
5.87674				2.34403
6.03587				2.34602
6.10496				2.35336
6.12345				2.35374
6.12378				2.35672
6.22886				2.3575
6.24593				2.43678
6.30935				2.44855
6.35462				2.45678
6.53967				2.45875
6.58794				2.45925
6.7326				2.46763
6.8253				2.49397
6.9235				2.50639
6.9457				2.51986
6.9625				2.54795
7.01425				2.55693
7.06379				2.55834
7.10833				2.56045
7.11146				2.56057
7.11235				2.56646
7.11235				2.56834
7.13556				2.57341
7.13632				2.57441
7.2521				2.57451
7.34636				2.58137
7.44525				2.58453
7.46522				2.60346
7.5249				2.62584
7.5446				2.65035
7.69893				2.65742
7.83665				2.65834
7.84567				2.66834
7.89646				2.67833
7.9346				2.67944
7.98653				2.68307
9.29464				2.68348
9.346				2.68353
9.69483				2.68441
9.73497				2.68639
9.93578				2.69541
				2.69734
				2.7084
				2.73464
				2.73815
				2.76119
				2.76834
				2.7784
				2.78053
				2.86245
				2.86245
				2.86346
				2.86713
				2.89055
				2.89373
				2.89946
				2.90848
				2.94476
				2.98454
				3.02473
				3.02568
				3.03684
				3.04789
				3.05783
				3.06459
				3.07723
				3.08239
				3.08386
				3.08459
				3.08648
				3.08973
				3.08974
				3.10309
				3.10557
				3.20678
				3.20785
				3.23775
				3.24286
				3.24585
				3.26877
				3.27866
				3.31079
				3.32264
				3.40456
				3.40587
				3.40768
				3.45622
				3.4568
				3.4683
				3.49574
				3.51168
				3.51349
				3.53598
				3.57437
				3.5755
				3.57864
				3.59169
				3.61235
				3.62068
				3.62583
				3.67077
				3.67125
				3.67231
				3.67349
				3.67832
				3.67833
				3.68076
				3.68375
				3.71458
				3.7241
				3.75834
				3.78347
				3.78474
				3.83721
				3.84982
				3.85286
				3.86206
				3.86684
				3.87458
				3.87902
				3.89865
				3.92584
				3.92756
				3.93295
				3.94564
				3.96734
				3.97359
				3.99394
				3.99724
				4.02537
				4.02583
				4.08245
				4.08659
				4.08766
				4.09731
				4.09976
				4.11476
				4.12455
				4.12484
				4.15321
				4.16073
				4.16279
				4.19094
				4.22428
				4.23835
				4.23958
				4.24877
				4.29723
				4.34987
				4.39696
				4.40947
				4.42759
				4.42839
				4.44639
				4.45771
				4.50913
				4.52735
				4.54674
				4.55586
				4.55868
				4.68279
				4.78344
				4.78653
				4.82348
				4.83253
				4.83638
				4.86349
				4.8664
				4.86785
				4.89499
				4.90253
				4.92249
				4.93687
				4.96734
				4.97325
				4.97334
				4.98713
				5.08337
				5.08957
				5.09734
				5.1235
				5.13846
				5.20005
				5.23187
				5.23475
				5.24823
				5.24872
				5.30816
				5.37998
				5.38979
				5.54041
				5.68789
				5.78222
				6.24925
				6.35925
				6.40277
				6.48909
				6.52793
				6.63305
				6.7681
				6.88247
				6.90899
				7.02486
				7.09249
				7.10545
				7.29745
				7.31902
				7.34094
				7.34637
				7.7255
				7.93566
				10.2376
				10.3903
				10.6429
				10.8035
				10.9348
				11.1003
				11.3986
				11.5396
				11.6299
				11.8328
				12.3195
				12.4407
				12.5416
				12.7504
				13.0046
				13.5833
				13.8268
				13.8742
				19.0497
				19.2068
				19.439
				19.5087
				19.7502
