# Supplementary material for: Variation of connectivity across exemplar sensory and associative thalamocortical loops in the mouse
Source: eLife. 2020 Oct 26;9:e62554. doi: 10.7554/eLife.62554 (PMC7644223; doi:10.7554/eLife.62554)
Supplement: Figure 5—figure supplement 2—source data 1. [file elife-62554-fig5-figsupp2-data1.xlsx]

## Sheet: RAW DATA - Starters
Starter counts for Rabaies tracing
Counts:
	MD-->PL						MGB-->A1
Animal ID	MDl	MDm	MDc	Sum		Animal ID	MGBd	MGBm	MGBv	Sum
MDPL1	183	32	11	226		MGBA1-1	102	22	262	386
MDPL2	57	5	0	62		MGBA1-2	16	80	104	200
MDPL3	115	6	6	127		MGBA1-3	109	61	279	449
PDPL4	207	0	0	207		MGBA1-4	141	23	369	533
MDPL5	36	1	1	38		MGBA1-5	58	42	239	339
Relative distribution of starter neurons (%)
Animal ID	MDl	MDm	MDc			Animal ID	MGBd	MGBm	MGBv
MDPL1	80.9735	14.1593	4.86726			MGBA1-1	26.4249	5.69948	67.8756
MDPL2	91.9355	8.06452	0			MGBA1-2	8	40	52
MDPL3	90.5512	4.72441	4.72441			MGBA1-3	24.2762	13.5857	62.1381
PDPL4	100	0	0			MGBA1-4	26.454	4.3152	69.2308
MDPL5	94.7368	2.63158	2.63158			MGBA1-5	17.1091	12.3894	70.5015
						Avg	20.4528	15.198	64.3492
