# Supplementary material for: Variation of connectivity across exemplar sensory and associative thalamocortical loops in the mouse
Source: eLife. 2020 Oct 26;9:e62554. doi: 10.7554/eLife.62554 (PMC7644223; doi:10.7554/eLife.62554)
Supplement: Figure 5—figure supplement 3—source data 1. [file elife-62554-fig5-figsupp3-data1.xlsx]

## Sheet: Sheet3
Retrograde inputs to MD-->PL and MGB-->A1 neurons (Figure 5 - figure supplement 3)
% Total Input (MD→PL)									% Total Input (MGB→A1)
Region	MDPL1	MDPL2	MDPL3	MDPL4	MDPL5				Region	MGBA1-1	MGBA1-2	MGBA1-3	MGBA1-4	MGBA1-5
M2	16.6149	7.06587	8.70787	11.9242	2.93945				TeA	2.58256	2.90652	5.35575	4.93694	3.60959
Cg	14.8976	6.16766	7.3435	10.1593	2.6455				Au1	2.62489	3.22074	5.10164	2.55856	1.7326
OC	1.67598	6.58683	4.374	4.64916	1.41093				AuD	1.73582	1.96386	3.44019	3.63964	1.64597
PrL	4.51066	1.73653	4.01284	3.91735	1.64609				AuV	2.32854	2.19953	0.625489	1.65766	2.28126
M1	1.14703	0.958084	1.60514	6.28498	0.411523				S2	1.39712	1.02121	0.0977326	0.900901	2.19463
DMS	2.45509	2.45509	1.92616	0.817908	1.76367				Ect	0.719729	0.785546	1.01642	1.8018	0.866301
VP	0.517277	1.55689	1.68539	0.430478	1.35215				ZI	2.15919	2.35664	0.0977326	0.576577	1.87699
AcbSh	0.599583	2.21557	0.561798	0.0430478	0.0587889				LH	1.65114	0.785546	0.0195465	0.432432	0.144383
VMS	0.538922	0.538922	1.48475	0.129143	0.587889				IC	33.5732	30.4792	39.0539	32.6847	23.1014
LH	4.34513	6.52695	7.26324	2.84115	9.64139				SC	11.8544	6.20581	11.1611	15.2793	13.572
ZI	1.73805	3.47305	5.939	2.10934	3.23339				DpMe	1.9475	2.43519	2.13057	1.11712	0.462027
LPO	1.13801	1.07784	0.642055	0.344382	0.646678				PAG	2.15919	0.864101	0.820954	1.40541	0.808548
SC	5.85558	5.86826	4.33387	5.72536	0.999412				LL	1.31245	1.02121	0.254105	1.22523	0.0866301
DpMe	1.24146	1.97605	1.24398	6.80155	4.52675				PL	1.10076	0.942655	0.039093	1.36937	0
PAG	2.85537	2.57485	3.45104	1.33448	4.40917
SNR	0.76557	2.33533	2.00642	0.947051	0.999412
APT	0.517277	0.778443	0.802568	0.904003	0.0587889
