# Supplementary material for: Variation of connectivity across exemplar sensory and associative thalamocortical loops in the mouse
Source: eLife. 2020 Oct 26;9:e62554. doi: 10.7554/eLife.62554 (PMC7644223; doi:10.7554/eLife.62554)
Supplement: Figure 7—source data 1. [file elife-62554-fig7-data1.xlsx]

## Sheet: RAW DATA - Cell counts
		# Cells								# Cells
Region	Abv	MDPL1	MDPL2	MDPL3	MDPL4	MDPL5		Region	Abv.	MGBA1-1	MGBA1-2	MGBA1-3	MGBA1-4	MGBA1-5
Oculomotor nucleus, parvicellular part	3PC	1	0	0	1	0		3rd Cerebellar lobule	3Cb	0	0	0	0	0
A14 dopamine cells	A14	1	0	0	0	0		4&5th Cerebellar lobules	4&5Cb	0	28	15	3	0
Anterior amygdaloid area, dorsal part	AAD	1	0	0	0	0		Motor trigeminal nucleus, temporalis part	5Te	0	0	5	4	0
Anterior amygdaloid area, ventral part	AAV	1	7	0	0	0		Agranular insular cortex, posterior part	AIP	0	1	0	0	0
Anterior commissural nucleus	AC	0	4	0	6	0		alveus of the hippocampus	alv	2	0	7	2	0
Anterior commisure, anterior part	aca	2	1	0	0	0		Amygdalopiriform transition area	Apir	0	0	0	1	0
Accumbens nucleus	Acb	2	0	1	0	0		Anterior pretectal nucleus	APT	28	5	15	6	15
Accumbens nucleus, core	AcbC	15	8	4	3	3		Arcuate hypothalamic nucleus, lateral part	ArcL	0	0	0	1	0
Accumbens nucleus, shell	AcbSh	23	37	14	1	10		Amygdalostriatal transition area	Astr	2	0	1	2	0
Anterodorsal thalamic nucleus	AD	10	7	11	0	8		Primary auditory cortex	Au1	62	41	261	71	60
Anterodorsal preoptic nucleus	ADP	5	0	0	4	3		Secondary auditory cortex, dorsal part	AuD	41	25	176	101	57
Anterior hypothalamic area, anterior part	AHA	5	0	1	0	12		Secondary auditory cortex, ventral part	AuV	55	28	32	46	79
Anterior hypothalamic area, posterior part	AHP	13	0	0	1	0		Anteroventral periventricular nucleus	AVPe	0	0	1	0	0
Agranular insular cortex	AI	40	26	79	4	1		brachium of the inferior colliculus	bic	5	0	35	10	21
alveus of the hippocampus	alv	14	0	0	0	3		Brachium of the superior colliculus	bsc	0	2	31	8	40
Anteromedial thalamic nucleus	AM	9	1	0	0	9		Bed nucleus of the stria terminalis	BST	0	0	0	1	0
Angular thalamic nucleus	Ang	0	0	0	4	5		Field CA1 of hippocampus	CA1	0	3	2	0	0
Anterior olfactory nucleus, medial part	AOM	0	1	0	0	1		Field CA3 of hippocampus	CA3	0	1	0	0	0
Anterior olfactory nucleus, posterior part	AOP	0	2	0	0	0		corpus callosum	cc	4	1	0	0	0
Amygdalopiriform transition area	Apir	1	0	0	0	0		Central amygdaloid nucleus, capsular part	CeC	1	0	0	0	0
Anterior pretectal nucleus	APT	25	13	20	21	1		Central amygdaloid nucleus, lateral division	CeL	2	0	1	0	2
Anterior pretectal nucleus, dorsal part	APTD	0	2	0	0	0		Central amygdaloid nucleus, medial division	CeM	0	0	0	2	3
Anterior pretectal nucleus, ventral part	APTV	4	0	0	0	0		Central amygdaloid nucleus, medial division, anterolateral part	CeMAD	3	1	0	0	0
Arcuate hypothalamic nucleus, lateral part	ArcL	0	1	0	0	1		cingulum	cg	3	7	10	1	0
Amygdalostriatal transition area	Astr	0	0	2	0	0		Commisure of the inferior colliculus	cic	2	5	8	0	0
Anterior tegmental nucleus	AT	2	0	0	0	0		Centrolateral thalamic nucleus	CL	0	0	0	0	4
Primary auditory cortex	Au1	1	1	0	0	1		Central medial thalamic nucleus	CM	0	0	5	0	0
Secondary auditory cortex, dorsal part	AuD	0	2	2	1	2		Cuneiform nucleus	CnF	27	6	59	2	36
Secondary auditory cortex, ventral part	AuV	0	2	1	1	2		cerebral peduncle, basal part	cp	4	4	13	6	10
Anteroventral thalamic nucleus	AV	17	2	6	0	1		Caudoputamen, caudal part	CPc	0	0	22	28	42
Nucleus of the brachium of the inferior colliculus	BIC	0	1	0	0	0		Commisure of the superior colliculus	csc	1	0	0	2	0
Basolateral amygdaloid nucleus, anterior part	BLA	0	1	9	0	0		DA11 dopamine cells	DA11	0	0	0	1	0
Basolateral amygdaloid nucleus, posterior part	BLP	0	0	1	0	0		Dorsal endopiriform nucleus	Den	0	0	1	0	0
Basomedial amygdaloid nucleus, posterior part	BMP	2	0	3	0	0		Dentate gyrus	DG	0	2	0	0	0
Brachium of the superior colliculus	bsc	0	0	0	0	1		dorsal hippocampal commisure	dhc	0	2	0	0	0
Bed nucleus of the stria terminalis	BST	21	4	12	2	5		Dysgranular insular cortex	DI	1	0	0	0	0
Field CA3 of hippocampus	CA3	0	0	4	0	0		Nucleus of Darkschwitsch	Dk	0	0	1	0	1
corpus callosum	cc	1	2	0	0	0		Dorsolateral entorhinal cortex	DLEnt	0	0	5	0	0
Central amygdaloid nucleus, lateral division	CeL	0	0	3	0	0		Dorsal lateral geniculate nucleus	DLG	2	0	0	0	21
Central amygdaloid nucleus, medial division, anterolateral part	CeMAD	0	0	3	0	0		Dorsal nucleus of the lateral lemniscus	DLL	8	0	7	0	0
Cingulate cortex	Cg	720	103	183	236	45		Dorsolateral striatum	DLS	1	0	0	0	0
cingulum	cg	12	3	0	30	9		Dorsomedial hypothalamic nucleus	DM	0	0	1	2	2
Centrolateral thalamic nucleus	CL	0	22	0	50	55		Dorsomedial tegmental area	DMTg	0	0	4	0	0
Claustrum	Cl	13	27	0	0	0		Deep mesencephalic nucleus	DpMe	46	31	109	31	16
Central medial thalamic nucleus	CM	8	1	33	2	0		Dorsal periolivary region	DPO	0	0	1	0	0
cerebral peduncle, basal part	cp	2	3	0	1	9		Deep white layer of the superior colliculus	DpWh	0	1	0	7	0
Caudoputamen, caudal part	CPc	0	0	0	1	0		Dorsal raphe nucleus	DR	6	2	8	1	1
Caudoputamen, rostral part	CPr	0	2	13	37	2		Dorsal subuiculum	DS	1	0	3	0	0
Commisure of the superior colliculus	csc	12	0	0	1	2		Dorsal terminal nucleus of the accessory optic tract	DT	1	0	1	6	0
DA13 dopamine cells	DA13	0	0	0	0	3		External capsule	ec	0	1	1	0	44
Dorsal endopiriform nucleus	Den	3	2	0	1	3		Ectorhinal cortex	Ect	17	10	52	50	30
dorsal fornix	df	2	0	0	0	0		External medullary lamina	eml	4	3	0	1	2
Dentate gyrus	DG	0	0	1	10	0		Ethmoid thalamic nucleus	Eth	5	0	0	0	0
dorsal hippocampal commisure	dhc	1	1	0	2	3		Edinger-Westphal nucleus	EW	1	0	0	0	0
Dysgranular insular cortex	DI	1	0	0	2	0		Nucleus of the fields of Forel	F	3	0	0	0	0
Nucleus of Darkschwitsch	Dk	5	3	9	10	1		fimbria of the hippocampus	fi	0	0	4	1	1
Dorsolateral entorhinal cortex	DLEnt	0	0	0	0	2		forceps major of the corpus callosum	fmj	0	3	0	0	0
Dorsal lateral geniculate nucleus	DLG	1	2	3	9	0		fasciculus retroflexus	fr	0	1	0	0	0
Dorsolateral striatum	DLS	0	6	30	3	0		Gemini hypothalamic nucleus	Gem	1	0	0	0	0
Dorsomedial hypothalamic nucleus	DM	16	2	2	3	12		Glomerular layer of the olfactory bulb	GI	0	5	0	3	0
Dorsomedial striatum	DMS	185	41	48	19	30		Globus pallidus	GP	0	0	3	8	10
Dorsal peduncular cortex	DP	0	0	0	0	1		Granular layer of the dentate gyrus	GrDG	0	0	5	1	21
Deep mesencephalic nucleus	DpMe	60	33	31	158	77		Gustatory thalamic nucleus	Gus	0	22	0	0	0
Deep white layer of the superior colliculus	DpWh	18	6	25	0	0		Nucleus of the horizontal limb of the diagonal band	HDB	0	0	2	0	0
Dorsal raphe nucleus	DR	2	0	0	0	0		Inferior colliculus	IC	793	388	1998	907	800
Dorsal subuiculum	DS	0	0	0	0	5		internal capsule	ic	15	32	0	30	13
External capsule	ec	2	0	0	13	0		Interfascicular nucleus	IF	0	0	3	0	0
Ectorhinal cortex	Ect	1	1	8	1	1		Intergeniculate leaf	IGL	4	1	0	0	1
External medullary lamina	eml	1	5	0	0	0		Intermediate nucleus of the lateral lemniscus	ILL	15	0	45	0	0
Entopeduncular nucleus	EP	0	0	0	1	3		Interstitial nucleus of Cajal	InC	1	0	1	0	0
Ethmoid thalamic nucleus	Eth	0	0	16	0	0		Intercollicular nucleus	InCo	41	14	0	0	0
Edinger-Westphal nucleus	EW	2	0	0	0	0		Intermediate reticular nucleus, anterior part	IRtA	0	0	0	4	0
fornix	f	0	0	0	0	7		Inferior salivatory nucleus	IS	32	2	0	0	0
Nucleus of the fields of Forel	F	7	0	0	16	2		Isthmic reticular formation	isRT	0	0	3	0	1
Field of Forel	FF	0	1	0	0	0		Ko'lliker-Fuse nucleus	KF	0	0	1	5	1
fimbria of the hippocampus	fi	0	0	0	0	2		Lateral amygdaloid nucleus, dorsolateral part	LaDL	1	0	1	4	18
forceps minor of the corpus callosum	fmi	53	1	0	15	28		Lateral amygdaloid nucleus, medial part	LaM	0	0	2	0	0
forceps major of the corpus callosum	fmj	14	1	0	0	0		Lateral amygdaloid nucleus, ventrolateral part	LaVL	0	0	1	0	0
fasciculus retroflexus	fr	18	21	0	3	4		Locus coeruleus	LC	2	0	0	0	0
Frontal association cortex	FrA	35	12	6	24	0		Laterodorsal tegmental nucleus, dorsal part	LDTd	0	0	8	0	2
Genu of thecorpus callosum	gcc	0	0	0	2	0		Laterodorsal tegmental nucleus	LDTg	3	0	0	0	0
Gemini hypothalamic nucleus	Gem	2	1	0	0	2		Lateral entorhinal cortex	Lent	0	1	0	0	0
Glomerular layer of the olfactory bulb	GI	1	0	0	1	0		Lateral globus pallidus	LGP	10	1	0	0	0
Globus pallidus	GP	0	0	0	3	4		Lateral hypothalamic area	LH	39	10	1	12	5
Granular layer of the dentate gyrus	GrDG	3	0	0	0	0		Lateral habenular nucleus	LHb	0	0	1	0	1
Nucleus of the horizontal limb of the diagonal band	HDB	19	13	10	0	4		Lateral lemniscus	LL	8	13	13	34	3
Intercalated nuclei of the amygdala	I	0	1	0	0	0		Lacunosum moleculare layer of the hippocampus	Lmol	0	0	0	0	6
Interanterodorsal thalamic nucleus	IAD	16	7	0	1	0		Lateral parabrachial nucleus	LPB	10	3	8	4	0
Interanteromedial thalamic nucleus	IAM	3	0	0	0	3		Lateral posterior thalamic nucleus, laterocaudal part	LPLC	0	2	8	0	0
internal capsule	ic	19	15	4	9	32		Lateral posterior thalamic nucleus, laterorostral part	LPLR	1	0	2	2	0
Intergeniculate leaf	IGL	4	1	0	1	0		Lateral posterior thalamic nucleus, mediocaudal part	LPMC	9	5	10	2	7
Infralimbic cortex	IL	10	0	0	12	6		Lateral posterior thalamic nucleus, mediodorsal part	LPMR	2	1	1	0	8
Intermediodorsal thalamic nucleus	IMD	0	0	6	0	0		Lateral preoptic area	LPO	0	0	1	0	0
Interstitial nucleus of Cajal	InC	12	0	0	7	1		Lateral parietal association cortex	LPtA	0	0	0	0	3
Interstitial nucleus of Cajal, greater part	InCG	0	1	0	0	0		Lateral terminal nucleus of the accessory optic tract	LT	0	3	0	0	0
Interstitial nucleus of the posterior limb of the anterior commissure, lateral part	IPACL	2	3	0	0	0		Primary motor cortex	M1	0	1	0	0	0
Interpeduncular nucleus, lateral subnucleus	IPL	10	0	0	0	3		Secondary motor cortex	M2	1	1	0	0	0
Lateroanterior hypothalamic nucleus	LA	5	0	0	0	0		Midbrain	MB	0	0	17	0	4
Lateral amygdaloid nucleus, ventrolateral part	LaVL	0	0	4	0	0		Middle cerebellar peduncle	mcp	0	0	4	0	0
Lateral amygdaloid nucleus, ventromedial part	LaVM	0	0	1	0	0		Magnocellular nucleus of the posterior commisure	MCPC	1	2	0	0	0
Lambdoid septal zone	Ld	0	1	0	0	0		Medial amygdaloid nucleus, posterodorsal part	MePD	0	0	1	0	0
Lateral nucleus of the diagonal band	LDB	0	0	0	0	1		Medial geniculate nucleus, dorsal part	MGBd	2	0	57	21	59
Laterodorsal thalamic nucleus, dorsomedial part	LDDM	0	1	0	2	1		Medial geniculate nucleus, medial part	MGBm	14	2	3	16	25
Laterodorsal thalamic nucleus, ventrolateral part	LDVL	14	10	0	0	0		Medial geniculate nucleus, ventral part	MGBv	9	18	141	40	240
Lateral entorhinal cortex	Lent	5	0	1	0	0		Medial globus pallidus	MGP	0	1	0	0	0
Lateral globus pallidus	LGP	6	5	24	0	0		Microcellular tegmental nucleus	MiTG	14	5	13	14	10
Lateral hypothalamic area	LH	210	109	181	66	164		Medial lemniscus	ml	7	3	0	0	2
Lateral habenular nucleus	LHb	31	14	31	11	22		Molecular layer of the dentate gyrus	MoDG	0	0	16	2	16
Lateral mammillary nucleus	LM	32	3	0	0	16		Medial preoptic area	MPA	0	0	6	0	0
Lacunosum moleculare layer of the hippocampus	Lmol	0	0	0	0	3		Medial parabrachial nucleus	MPB	1	0	3	4	0
Nucleus of the lateral olfactory tract	LOT	0	2	0	0	0		Medial parietal association cortex	MPtA	0	0	0	0	12
Lateral posterior thalamic nucleus, mediocaudal part	LPMC	0	1	0	0	0		Medial reticular formation	mRT	0	0	3	13	6
Lateral posterior thalamic nucleus, mediodorsal part	LPMR	0	14	12	2	16		Medial septal nucleus	MS	0	0	3	0	0
Lateral preoptic area	LPO	55	18	16	8	11		Meidal terminal nucleus of the accessory of the optic tract	MT	2	0	0	0	1
Lateral parietal association cortex	LPtA	1	4	6	3	1		Mammilothalamic tract	mt	1	0	0	0	0
Lateral septal nucleus	LS	0	0	8	0	0		Medial verstibular nucleus, parvicellular part	MVePC	0	2	0	0	0
Lateral septal nucleus, dorsal part	LSD	2	0	0	0	0		Marginal zone of the medial geniculate	MZMG	0	0	25	34	50
Lateral septal nucleus, intermediate part	LSI	13	5	0	0	0		Nigrostriatal bundle	ns	4	7	0	0	0
Primary motor cortex	M1	68	16	40	146	7		Optic nerve layer of the superior colliculus	Op	30	0	352	0	137
Secondary motor cortex	M2	803	118	217	277	50		Olivary pretectal nucleus	OPT	2	2	2	1	3
Medial accessory oculomotor nucleus	MA3	0	0	0	2	0		Optic tract	opt	0	6	52	12	0
Magnocellular nucleus of the lateral hypothalamus	MCLH	0	1	7	0	0		Oriens layer of the hippocampus	Or	0	9	3	1	23
Magnocellular nucleus of the posterior commisure	MCPC	5	1	2	5	0		Nucleus of the optic tract	OT	3	1	7	2	7
Magnocellular preoptic nucleus	MCPO	1	16	7	0	0		p1 Reticular formation	p1Rt	0	0	0	91	0
Mediodorsal thalamic nucleus	MD	2	3	0	5	2		Perifacial zone	P7	0	2	0	0	0
Mediodorsal thalamic nucleus, central part	MDc	2	11	7	4	7		Parafascicular thalamic nucleus	PaF	0	0	3	0	0
Mediodorsal thalamic nucleus, lateral part	MDl	0	64	14	81	86		Periaqueductal gray	PAG	51	11	42	39	28
Mediodorsal thalamic nucleus, medial part	MDm	0	1	1	4	1		Paraventricular hypothalamic nucleus, medial parvicelluar part	PaPo	0	1	0	0	0
Medial amygdaloid nucleus, anterior part	MeA	0	0	3	0	0		Parabigeminal nucleus	PBG	1	0	0	0	0
Medial amygdaloid nucleus, anterior dorsal part	MeAD	2	2	0	0	0		Posterior commisure	pc	2	0	1	1	0
Medial amygdaloid nucleus, anteroventral part	MeAV	0	2	0	0	0		Nucleus of the posterior commisure	Pcom	1	0	0	1	0
Medial entorhinal cortex	Ment	0	0	0	0	5		Parvicelular reticular nucleus, alpha part	PCRtA	0	3	0	0	0
Medial amygdaloid nucleus, posterodorsal part	MePD	0	1	1	0	0		Parafascicular thalamic nucleus	PF	12	7	0	0	0
Medial amygdaloid nucleus, posteroventral part	MePV	0	0	0	0	3		Posterior hypothalamic area	PH	16	5	3	5	1
Medial globus pallidus	MGP	0	2	0	0	0		Posterior intralaminar thalamic nucleus	PIL	40	8	4	37	23
Medial habenular nucleus	MHb	1	14	4	0	0		Paralemniscal nucleus	PL	26	12	3	38	0
Medial lemniscus	ml	6	6	0	5	1		Posterior limitans thalamic nucleus	Pli	3	0	0	1	0
Medial mammilary nucleus, lateral part	ML	12	5	0	0	0		Pontine nuclei	Pn	2	0	0	2	0
Medial longitudinal fasciculus	mlf	21	0	0	3	0		Paranigral nucleus	PN	1	0	0	0	0
Medial mammilary nucleus, medial part	MM	8	7	8	0	0		Pontine reticular nucleus, caudal part	PnC	0	0	1	8	0
Median preoptic nucleus	MnPO	1	1	1	0	0		Pontine reticular nucleus, oral part	PnO	47	2	9	10	0
Median raphe nucleus	MnR	2	0	0	0	1		Posterior thalamic nuclear group	Po	10	1	1	0	31
Molecular layer of the dentate gyrus	MoDG	0	0	0	0	1		Polymorph layer of the dentate gyrus	PoDG	0	0	3	0	23
Medial preoptic area	MPA	18	4	0	8	5		Posterior thalamic nuclear group, triangular part	PoT	64	37	10	17	7
Medial preoptic nucleus, central part	MPOC	0	1	0	0	0		Peripeduncular nucleus	PP	21	0	0	0	44
Medial preoptic nucleus, lateral part	MPOL	0	0	0	0	3		Posterior pretectal nucleus	PPT	18	5	7	0	0
Medial preoptic nucleus, medial part	MPOM	3	0	5	0	0		Prerubral field	PR	2	0	1	0	0
Medial pretectal nucleus	MPT	0	0	0	0	5		Principal sensory trigeminal nucleus	Pr5	1	2	0	0	0
Medial parietal association cortex	MPtA	14	3	0	6	26		Precommissural nucleus	PrC	0	4	0	0	0
Mammilary recess of the 3rd ventricle	Mre	3	0	0	0	0		Precuneus	PrCn	1	0	5	0	30
Medial septal nucleus	MS	8	6	1	1	0		Primary fissure	PRF	0	0	2	0	0
Mammilothalamic tract	mt	5	8	0	0	2		Pregeniculate nucleus of the prethalamus	PrG	0	0	2	0	1
Meidal terminal nucleus of the accessory of the optic tract	MT	0	0	0	0	1		Pregeniculate nucleus, magnocellular part	PrGM	0	0	7	2	5
Mammilotegmental tract	mtg	3	0	0	0	0		Pregeniculate nucleus, parvocellular part	PrGPC	0	0	0	2	8
Meidal tuberal nucleus	Mtu	12	0	0	0	0		Perirhinal cortex	PRh	0	1	6	0	0
Nigrostriatal bundle	ns	11	9	0	1	7		Parastrial nucleus	PS	0	0	6	0	0
Orbitalfrontal cortex	OC	81	110	109	108	24		Parasubthalamic nucleus	PSTh	1	0	0	0	0
Optic nerve layer of the superior colliculus	Op	19	4	0	0	1		Pontine tegmental nucleus	PTg	0	0	2	3	3
Olivary pretectal nucleus	OPT	1	2	2	0	2		Paraventricular fiber system	pv	0	4	0	0	0
Optic tract	opt	18	2	0	1	8		Periventricular gray	PVG	0	0	0	12	3
Oriens layer of the hippocampus	Or	0	0	1	0	0		Pyramidal cell layer of the hippocampus	Py	0	4	0	0	20
Peritrigeminal zone	P5	0	2	0	0	0		Stratum radiatum of the hippocampus	Rad	0	3	1	0	22
Parafascicular thalamic nucleus	PaF	0	0	0	25	15		Raphe cap	RC	0	3	0	0	0
Periaqueductal gray	PAG	138	43	86	31	75		Retroethmoid nucleus	Reth	2	10	0	0	0
Paraventricular hypothalamic nucleus, lateral magnocellular part	PaLM	1	0	0	0	0		Rhinal fissure	Rf	6	0	1	0	0
Paraventricular hypothalamic nucleus, medial parvicelluar part	PaPo	0	0	2	0	6		Red nucleus, magnocellular part	RMC	2	0	0	0	0
Paraxiphoid nucleus of thalamus	PaXi	0	0	0	0	1		Red nucleus, parvicellular part	RPC	9	0	1	0	1
Parabrachial pigmented nucleus	PBP	0	1	0	3	2		Retroparafascicular nucleus	RPF	1	0	0	0	0
Paracentral thalamic nucleus	PC	2	3	0	15	7		Rostral periolivary region	RPO	10	1	0	0	0
Posterior commisure	pc	10	2	0	6	2		Retrorubral nucleus	RR	0	1	0	0	0
Nucleus of the posterior commisure	Pcom	5	3	0	3	7		Retrorubral field	RRF	0	1	0	0	0
periventricular hypothalamic nucleus	Pe	1	0	0	0	1		Rubrospinal tract	rs	3	0	5	8	0
Perifornical nucleus	PeF	6	0	0	0	0		Retrosplenial granular cortex	RSG	0	2	0	0	0
Parafascicular thalamic nucleus	PF	19	6	6	11	0		Reticular thalamic nucleus	RT	45	66	200	146	132
Posterior hypothalamic area	PH	88	5	20	14	9		Reticulotegmental nucleus of the pons	RtTg	2	1	0	0	0
Posterior intralaminar thalamic nucleus	PIL	0	0	3	0	0		Subiculum	S	0	6	0	0	0
Piriform cortex	Pir	4	9	14	0	8		Primary somatosensory cortex	S1	6	5	0	6	48
Premammillary nucleus, dorsal part	PMD	4	0	0	0	1		Secondary somatosensory cortex	S2	33	13	5	25	76
Paramedian raphe nucleus	PMnR	3	0	0	1	0		Sagulum nucleus	Sag	0	0	0	8	9
Premammillary nucleus, ventral part	PMV	0	0	0	0	1		Superior colliculus	SC	280	79	571	424	470
Pontine reticular nucleus, oral part	PnO	10	0	0	29	3		Superior cerebellar peduncle	scp	2	15	7	0	0
Posterior thalamic nuclear group	Po	9	7	3	10	6		Suprageniculate thalamic nucleus	SG	7	2	0	0	7
Posterior thalamic nuclear group, triangular part	PoT	5	2	8	2	0		Septohypothalamic nucleus	Shy	0	0	1	0	0
Posterior pretectal nucleus	PPT	5	2	0	0	0		Substantia innominata	SI	2	2	0	0	0
Prerubral field	PR	6	2	1	0	0		Substantia nigra, compact part	SNC	0	0	2	1	0
Precommissural nucleus	PrC	0	4	26	16	16		Substantia nigra, lateral part	SNL	3	0	3	1	3
Pregeniculate nucleus, magnocellular part	PrGM	0	0	0	0	6		Substantia nigra, reticular part	SNR	1	0	2	0	1
Pregeniculate nucleus, parvocellular part	PrGPC	0	0	0	2	4		supraoptic decussation	sox	0	0	0	1	0
Perirhinal cortex	PRh	3	0	5	0	22		Subparafascicular thalamic nucleus	SPF	5	3	0	9	1
Prelimbic cortex	PrL	218	29	100	91	28		Subpedencular tegmental nucleus	SPTg	1	0	0	0	0
Presubiculum	PrS	3	0	3	0	0		Stria terminalis	st	7	4	0	4	0
Parasubthalamic nucleus	PSTh	6	0	1	5	2		Subthalamic nucleus	STh	0	2	1	0	0
Paratenial thalamic nucleus	PT	11	0	0	7	0		Superior thalamic radiation	str	0	3	1	1	6
Pontine tegmental nucleus	PTg	4	0	0	4	0		Supraoculomotor cap	Su3C	1	0	0	0	0
Paraventricular fiber system	pv	3	14	9	0	0		Supratrigeminal nucleus	Su5	0	0	4	6	0
Paraventricular thalamic nucleus	PV	9	3	12	0	1		Submedius thalamic nucleus	Sub	0	0	0	5	0
Paraventricular thalamic nucleus, anterior part	PVA	0	0	4	1	0		Subbrachial nucleus	SubB	0	0	0	5	0
Periventricular gray	PVG	5	0	0	4	0		Subcoerleus nucleus	SubC	0	0	6	4	0
Paraventricular thalamic nucleus, posterior part	PVP	0	0	4	0	4		Subgeniculate nucleus	SubG	0	3	26	0	29
Pyramidal cell layer of the hippocampus	Py	0	1	1	0	0		Superficial gray layer of the superior colliculus	SuG	15	0	155	80	154
Stratum radiatum of the hippocampus	Rad	0	1	0	0	3		Tuber cinereum area	TC	1	3	0	0	0
Reuniens thalamic nucleus	Re	12	2	2	1	1		Temporal association cortex	TeA	61	37	274	137	125
Rhomboid thalamic nucleus	Rh	6	3	5	0	0		Primary visual cortex	V1	8	51	0	1	0
Rostral interstitial nucleus of mdial longitudinal fasciculus	RI	12	0	0	6	0		Secondary visual cortex	V2	13	15	0	4	0
Rostral linear nucleus of the raphe	Rli	13	0	7	2	1		Ventral lateral geniculate nucleus	VLG	17	8	0	0	0
Red nucleus, magnocellular part	RMC	0	0	4	0	1		Ventral nucleus of the lateral lemniscus	VLL	0	0	0	0	0
Retromammillary nucleus, medial part	RMM	6	0	0	0	4		Ventrolateral tegmental area	VLTg	0	0	0	0	0
Red nucleus, parvicellular part	RPC	20	5	5	5	25		Ventromedial thalamic nucleus	VM	6	3	1	2	3
Retroparafascicular nucleus	RPF	10	0	0	7	0		Ventormedial striatum	VMS	7	2	0	0	3
Retrorubral field	RRF	11	0	0	2	0		Vascular organ of the lamina terminalis	VOLT	0	0	1	0	0
Rubrospinal tract	rs	0	0	0	3	6		Ventral posterolateral thalamic nucleus	VPL	0	1	0	0	3
Retrosplenial agranular cortex	RSA	49	44	9	0	0		Ventral posteromedial thalamic nucleus	VPM	0	0	1	3	19
Retrosplenial granular cortex	RSG	17	6	2	0	3		Ventral reuniens thalamic nucleus	Vre	0	0	0	0	2
Reticular thalamic nucleus	RT	241	50	244	107	141		Ventral striatum	VS	12	7	0	23	10
Subiculum	S	9	2	2	0	0		Ventral spinocerebellar tract	vsc	0	3	0	6	0
Primary somatosensory cortex	S1	23	15	42	89	18		Ventral tegmental area	VTA	7	2	0	0	0
Secondary somatosensory cortex	S2	0	0	15	11	1		Zona incerta	ZI	51	30	5	16	65
Superior colliculus	SC	283	98	108	133	17		Zonal layer of the superior colliculus	Zo	0	0	1	7	65
Splenium of the corpus callosum	scc	0	0	0	0	2			Total	2362	1273	5116	2775	3463
Subcommissural nucleus	Scom	11	0	4	4	0
Superior cerebellar peduncle	scp	0	1	0	2	2
Septofimbrial nucleus	Sfi	11	0	0	5	1
Septohypothalamic nucleus	Shy	3	0	5	0	2
Substantia innominata	SI	33	0	9	0	0
Semilunar nucleus	SL	9	0	0	8	0
Sublenticular extended amygdala, central part	SLEAC	4	0	0	0	0
Sublenticular extended amygdala, medial part	SLEAM	0	0	3	0	0
Stria medullaris of the thalamus	sm	3	1	0	7	2
Submammillothalamic nucleus	SMT	2	0	0	6	0
Substantia nigra, compact part	SNC	6	4	20	7	1
Substantia nigra, lateral part	SNL	0	2	5	0	0
Substantia nigra, reticular part	SNR	37	39	50	22	17
Subparafascicular thalamic nucleus	SPF	0	3	0	5	3
Subpedencular tegmental nucleus	SPTg	0	0	0	0	0
Stria terminalis	st	4	2	0	0	0
Subthalamic nucleus	STh	0	7	0	0	0
Superior thalamic radiation	str	2	0	0	0	2
Supraoculomotor periaqueductal gray	Su3	2	2	0	1	0
Supraoculomotor cap	Su3C	12	0	4	0	0
Submedius thalamic nucleus	Sub	1	0	0	1	0
Subbrachial nucleus	SubB	3	0	6	0	0
Subgeniculate nucleus	SubG	1	0	0	2	0
Subincertal nucleus	SubI	2	5	0	0	4
Submedius thalamic nucleus, ventral part	SubV	0	0	0	0	3
Superficial gray layer of the superior colliculus	SuG	0	1	0	0	0
Supramammillary nucleus, lateral part	SuML	8	3	7	5	0
Supramammillary nucleus, medial part	SuMM	4	2	13	0	0
Temporal association cortex	TeA	4	1	0	0	2
Triangular septal nucleus	TS	2	0	0	5	0
Olfactory tubercle	Tu	1	0	8	0	0
Primary visual cortex	V1	15	3	0	6	4
Secondary visual cortex	V2	136	6	3	1	61
Ventral anterior thalamic nucleus	VA	28	0	0	7	34
Nucleus of the vertical limb of the diagonal band	VDB	5	1	0	4	1
Ventrolateral thalamic nucleus	VL	0	47	0	9	3
Ventral lateral geniculate nucleus	VLG	11	0	2	0	6
Ventrolateral preoptic nucleus	VLPO	2	0	0	0	0
Ventrolateral striatum	VLS	0	2	14	1	0
Ventromedial thalamic nucleus	VM	0	4	10	6	4
Ventromedial hypothalamic nucleus	VMH	6	0	0	0	9
Ventormedial striatum	VMS	26	9	37	3	10
Vascular organ of the lamina terminalis	VOLT	4	0	0	3	1
Ventral pallidum	VP	25	26	42	10	23
Ventral posterolateral thalamic nucleus	VPL	3	0	0	5	27
Ventral posteromedial thalamic nucleus	VPM	3	0	0	3	6
Ventral reuniens thalamic nucleus	Vre	0	1	0	0	18
Ventral striatum	VS	6	0	8	3	0
Ventral tegmental area	VTA	9	3	20	0	9
Ventral tuberomammillary nucleus	VTM	0	0	0	0	28
Ventral tenia tecta	VTT	0	0	1	0	0
Xiphoid thalamic nucleus	Xi	0	0	2	0	0
Decussation of the superior cerebellar peduncle	xscp	0	0	0	5	0
Zona incerta	ZI	84	58	148	49	55
	Total	4833	1670	2492	2323	1701

## Sheet: Input to Starter Ratios
		Input to starter ratios (Figure 7)
		MD-->PL						MGB-->A1
		Secondary motor cortex - M2						Temporal Association Area - TeA								Primary auditory cortex
Animal	Cell count	Starters in MD	Input to starter Ratio			Animal	Cell count	Starters in MGB	Input to starter Ratio							Secondary auditory cortex, dorsal part
MDPL1	803	226	3.5531			MGBA1-1	61	386	0.158031							Secondary auditory cortex, ventral part
MDPL2	118	62	1.90323			MGBA1-2	37	200	0.185
MDPL3	217	127	1.70866			MGBA1-3	274	449	0.610245
MDPL4	277	207	1.33816			MGBA1-4	137	533	0.257036
MDPL5	50	38	1.31579			MGBA1-5	125	339	0.368732
		Cingulate cortex - Cg						Primary auditory cortex - Au1
Animal	Cell count	Starters in MD	Input to starter Ratio			Animal	Cell count	Starters in MGB	Input to starter Ratio
MDPL1	720	226	3.18584			MGBA1-1	62	386	0.160622
MDPL2	103	62	1.66129			MGBA1-2	41	200	0.205
MDPL3	183	127	1.44094			MGBA1-3	261	449	0.581292
MDPL4	236	207	1.1401			MGBA1-4	71	533	0.133208
MDPL5	45	38	1.18421			MGBA1-5	60	339	0.176991
		Orbitofrontal cortex - OC					Secondary auditory cortex, dorsal part - AuD
Animal	Cell count	Starters in MD	Input to starter Ratio			Animal	Cell count	Starters in MGB	Input to starter Ratio
MDPL1	81	226	0.358407			MGBA1-1	41	386	0.106218
MDPL2	110	62	1.77419			MGBA1-2	25	200	0.125
MDPL3	109	127	0.858268			MGBA1-3	176	449	0.391982
MDPL4	108	207	0.521739			MGBA1-4	101	533	0.189493
MDPL5	24	38	0.631579			MGBA1-5	57	339	0.168142
		Prelimbic cortex - PL					Secondary auditory cortex, ventral part - AuV
Animal	Cell count	Starters in MD	Input to starter Ratio			Animal	Cell count	Starters in MGB	Input to starter Ratio
MDPL1	218	226	0.964			MGBA1-1	55	386	0.142487
MDPL2	29	62	0.4682			MGBA1-2	28	200	0.14
MDPL3	100	127	0.78667			MGBA1-3	32	449	0.0712695
MDPL4	91	207	0.4404			MGBA1-4	46	533	0.0863039
MDPL5	28	38	0.7372			MGBA1-5	79	339	0.233038
		Midbrain - Superior Colliculus - SC					Midbrain - Inferior Colliculus - IC
Animal	Cell count	Starters in MD	Input to starter Ratio			Animal	Cell count	Starters in MGB	Input to starter Ratio
MDPL1	283	226	0.964			MGBA1-1	793	386	2.0544
MDPL2	98	62	0.4682			MGBA1-2	388	200	1.94
MDPL3	108	127	0.78667			MGBA1-3	1998	449	4.44989
MDPL4	133	207	0.4404			MGBA1-4	907	533	1.70169
MDPL5	17	38	0.7372			MGBA1-5	800	339	2.35988
									2.50117

## Sheet: Layerwise distribution of input
							Laminar Distribution of Retrograde inputs
Counts						MD-->PL			Relative layerwise distribution (%)						Counts						MGB-->A1			Relative layerwise distribution (%)
		M2														TeA
Animal	MDPL1	MDPL2	MDPL3	MDPL4	MDPL5		Animal	MDPL1	MDPL2	MDPL3	MDPL4	MDPL5			Animal	MGBA1-1	MGBA1-2	MGBA1-3	MGBA1-4	MGBA1-5		Animal	MGBA1-1	MGBA1-2	MGBA1-3	MGBA1-4	MGBA1-5
L1	0	0	0	0	0		L1	0	0	0	0	0			L1	0	0	0	0	0		L1	0	0	0	0	0
L2/3	161	14	8	0	1		L2/3	20.0498	11.8644	3.68664	0	2			L2/3	2	0	4	0	0		L2/3	3.27869	0	1.45985	0	0
L5	306	32	72	43	20		L5	38.1071	27.1186	33.1797	15.5235	40			L5	18	7	79	18	7		L5	29.5082	18.9189	28.8321	13.1387	5.6
L6	336	72	137	234	29		L6	41.8431	61.0169	63.1336	84.4765	58			L6	41	30	191	119	118		L6	67.2131	81.0811	69.708	86.8613	94.4
Sum	803	118	217	277	50										Sum	61	37	274	137	125
		Cg														Au1
Animal	MDPL1	MDPL2	MDPL3	MDPL4	MDPL5		Animal	MDPL1	MDPL2	MDPL3	MDPL4	MDPL5			Animal	MGBA1-1	MGBA1-2	MGBA1-3	MGBA1-4	MGBA1-5		Animal	MGBA1-1	MGBA1-2	MGBA1-3	MGBA1-4	MGBA1-5
L1	0	0	0	0	0		L1	0	0	0	0	0			L1	0	0	0	0	0		L1	0	0	0	0	0
L2/3	221	20	0	1	1		L2/3	30.6944	19.4175	0	0.423729	2.22222			L2/3	2	2	30	0	3		L2/3	3.22581	4.87805	11.4943	0	5
L5	233	47	54	47	17		L5	32.3611	45.6311	29.5082	19.9153	37.7778			L5	12	12	71	3	13		L5	19.3548	29.2683	27.2031	4.22535	21.6667
L6	266	36	129	188	27		L6	36.9444	34.9515	70.4918	79.661	60			L6	48	27	160	68	44		L6	77.4194	65.8537	61.3027	95.7746	73.3333
Sum	720	103	183	236	45										Sum	62	41	261	71	60
		OC														AuD
Animal	MDPL1	MDPL2	MDPL3	MDPL4	MDPL5		Animal	MDPL1	MDPL2	MDPL3	MDPL4	MDPL5			Animal	MGBA1-1	MGBA1-2	MGBA1-3	MGBA1-4	MGBA1-5		Animal	MGBA1-1	MGBA1-2	MGBA1-3	MGBA1-4	MGBA1-5
L1	0	0	0	0	0		L1	0	0	0	0	0			L1	0	0	0	0	0		L1	0	0	0	0	0
L2/3	27	44	7	24	5		L2/3	33.3333	40	6.42202	22.2222	20.8333			L2/3	4	2	8	0	2		L2/3	9.7561	8	4.54545	0	3.50877
L5	45	50	68	61	13		L5	55.5556	45.4545	62.3853	56.4815	54.1667			L5	8	10	42	7	5		L5	19.5122	40	23.8636	6.93069	8.77193
L6	9	16	34	23	6		L6	11.1111	14.5455	31.1927	21.2963	25			L6	29	13	126	94	50		L6	70.7317	52	71.5909	93.0693	87.7193
Sum	81	110	109	108	24										Sum	41	25	176	101	57
		PL														AuV
Animal	MDPL1	MDPL2	MDPL3	MDPL4	MDPL5		Animal	MDPL1	MDPL2	MDPL3	MDPL4	MDPL5			Animal	MGBA1-1	MGBA1-2	MGBA1-3	MGBA1-4	MGBA1-5		Animal	MGBA1-1	MGBA1-2	MGBA1-3	MGBA1-4	MGBA1-5
L1	0	0	0	0	0		L1	0	0	0	0	0			L1	0	0	0	0	0		L1	0	0	0	0	0
L2/3	22	0	5	0	2		L2/3	10.0917	0	5	0	7.14286			L2/3	1	0	3	0	2		L2/3	1.81818	0	9.375	0	2.53165
L5	144	21	65	78	15		L5	66.055	72.4138	65	85.7143	53.5714			L5	18	4	14	12	10		L5	32.7273	14.2857	43.75	26.087	12.6582
L6	52	8	30	13	11		L6	23.8532	27.5862	30	14.2857	39.2857			L6	36	24	15	34	67		L6	65.4545	85.7143	46.875	73.913	84.8101
Sum	218	29	100	91	28										Sum	55	28	32	46	79
